# Supplementary material for: Nucleic acid binding proteins affect the subcellular distribution of phosphorothioate antisense oligonucleotides
Source: PubMed Central journal article supplement — Nucleic Acids Res. 2017 Aug 9;45(18):10649–71. doi: 10.1093/nar/gkx709 (PMC5737868; doi:10.1093/nar/gkx709), 2017-08-09
Supplement: gkx709_supp.pdf [file gkx709_supp.pdf]

# Supplementary Figure 1

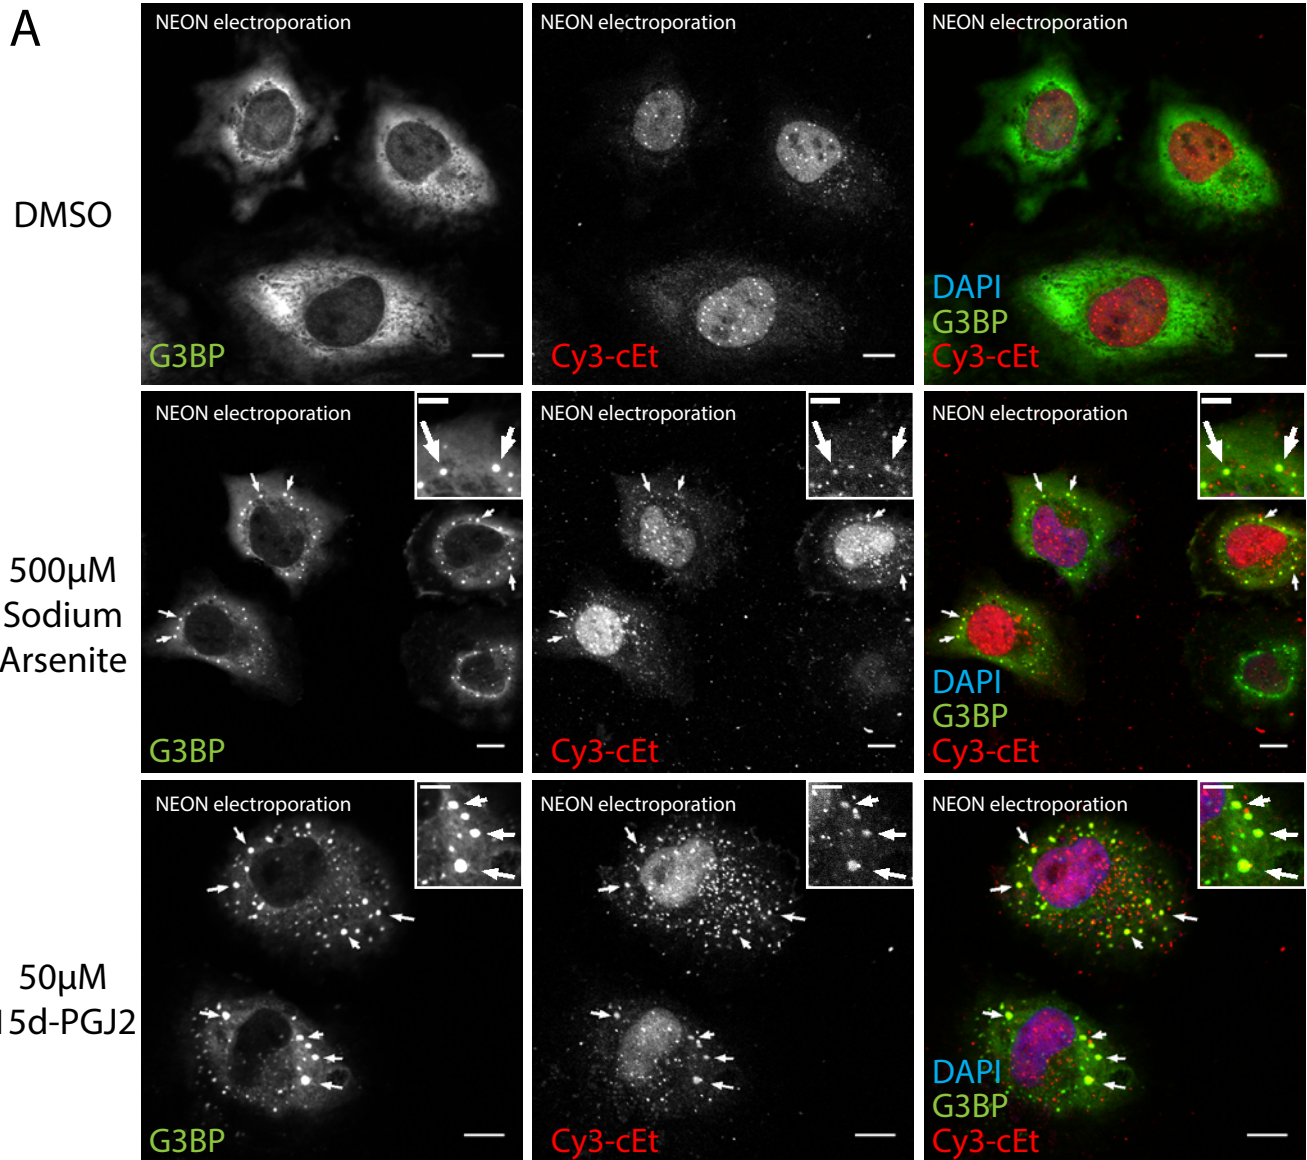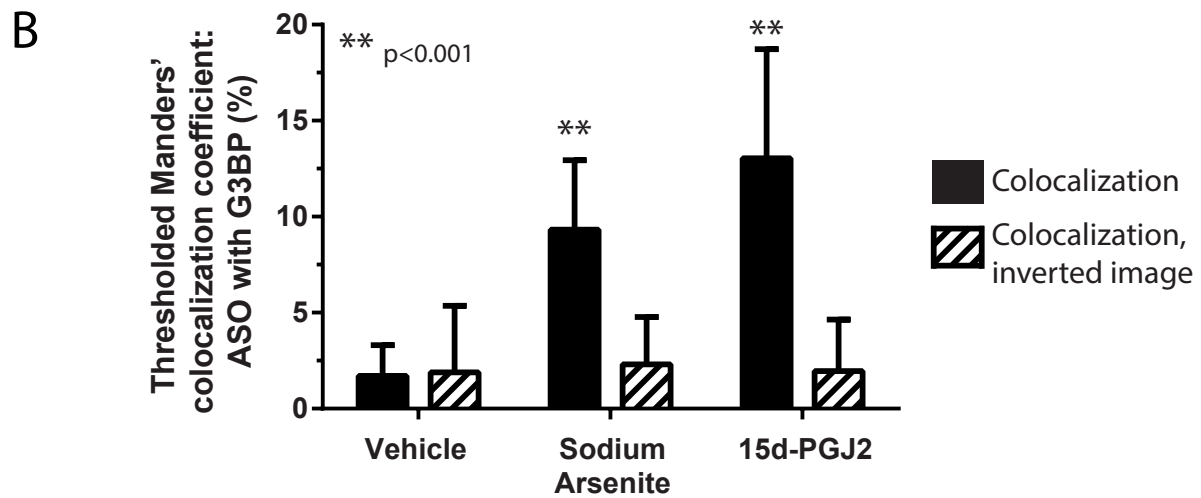

## Supplementary Figure 2

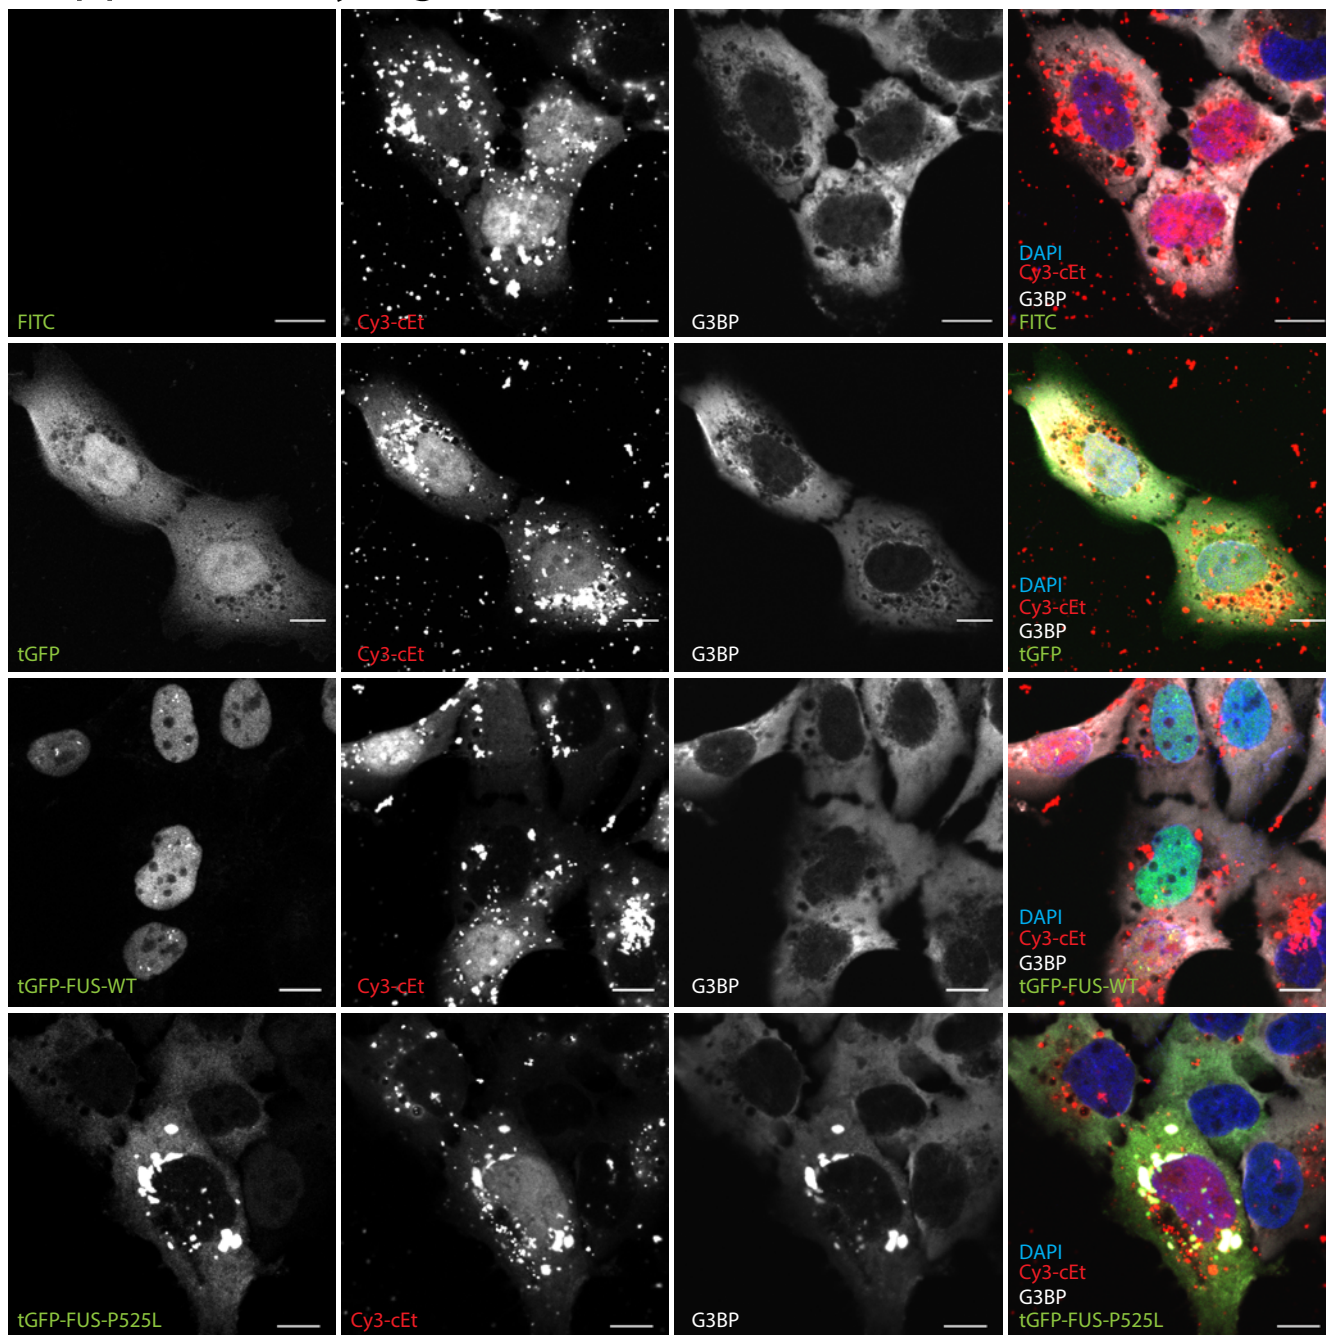

# Supplementary Figure 3

## A HA-FUS-WT

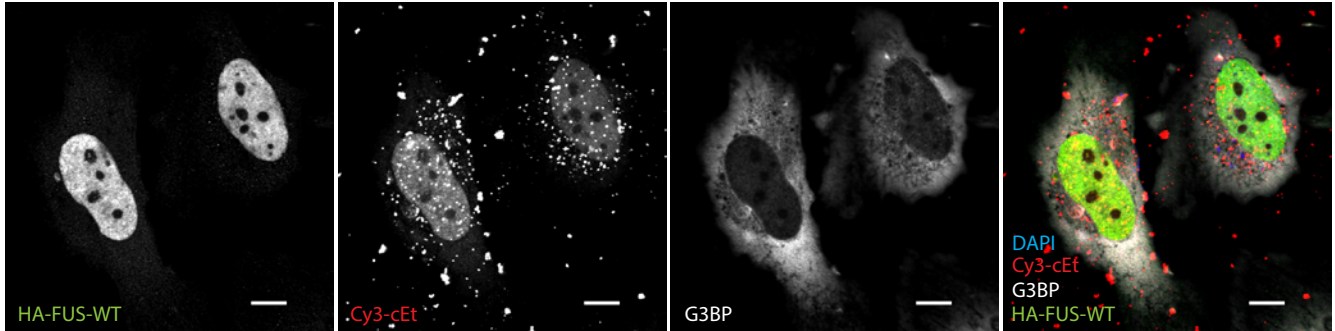

## B HA-FUS-P525L

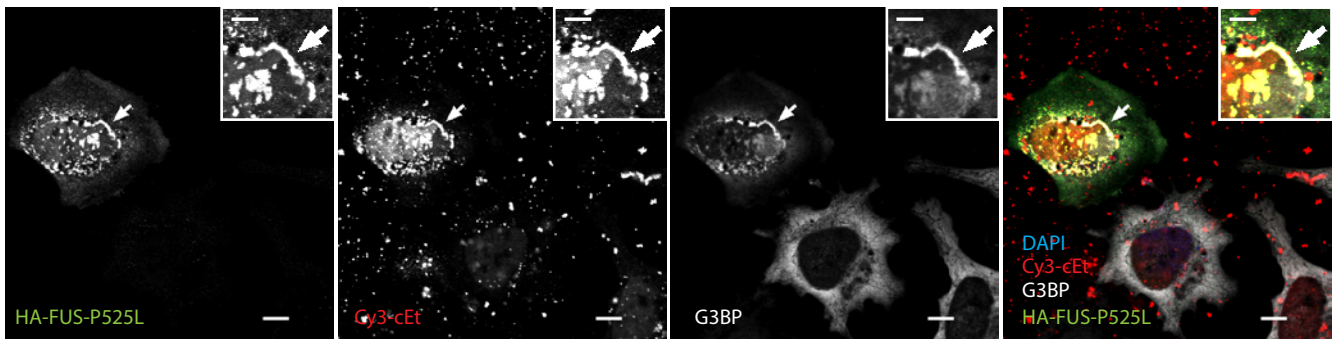

## C

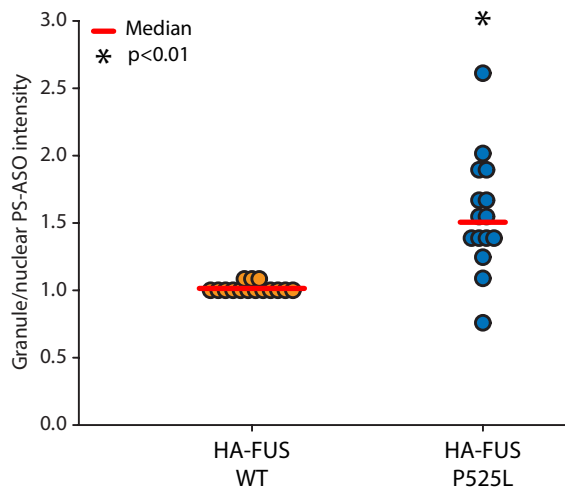

## D

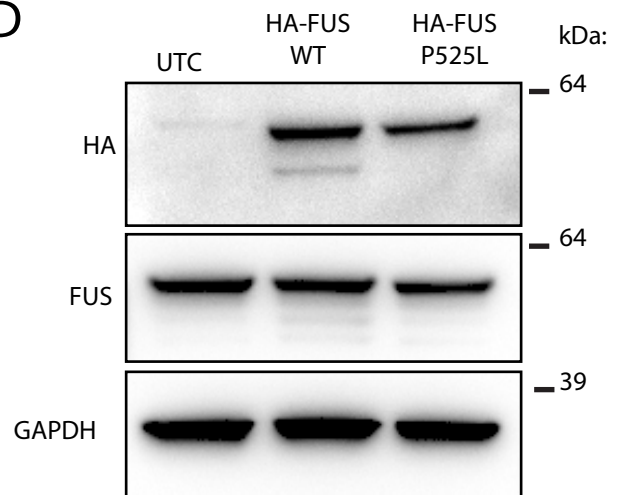

# Supplementary Figure 4

A

UTC

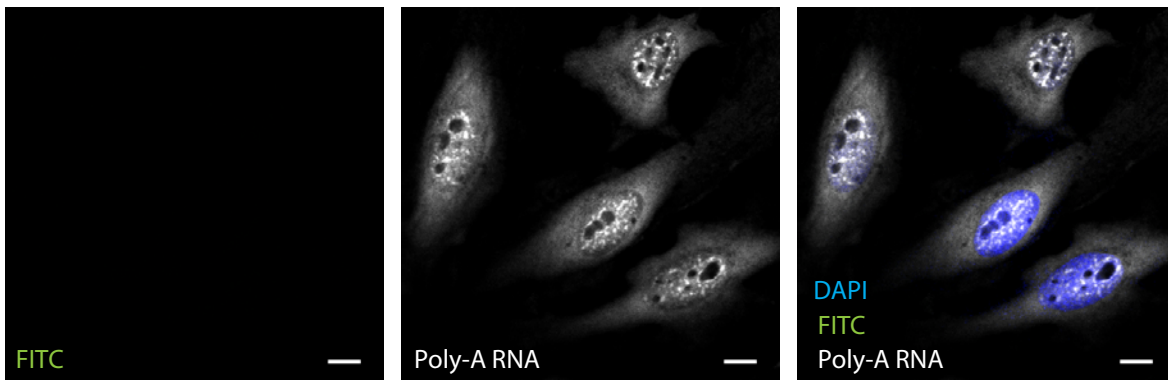

tGFP

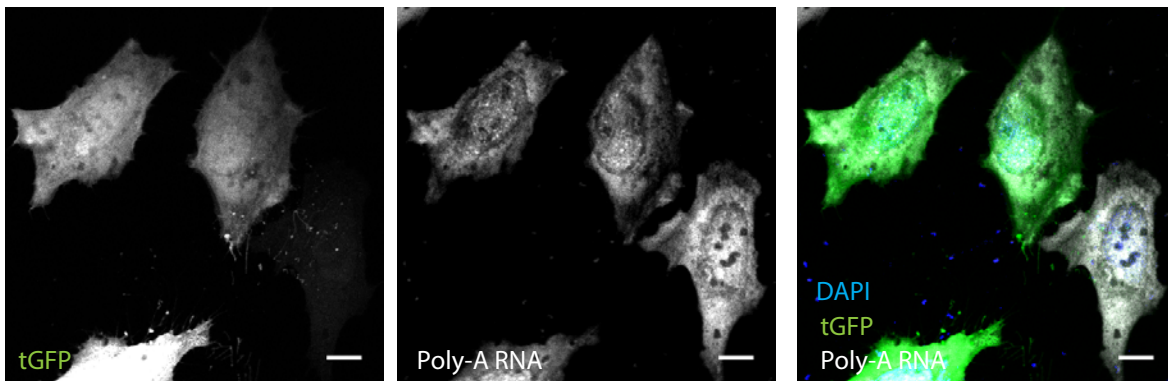

B

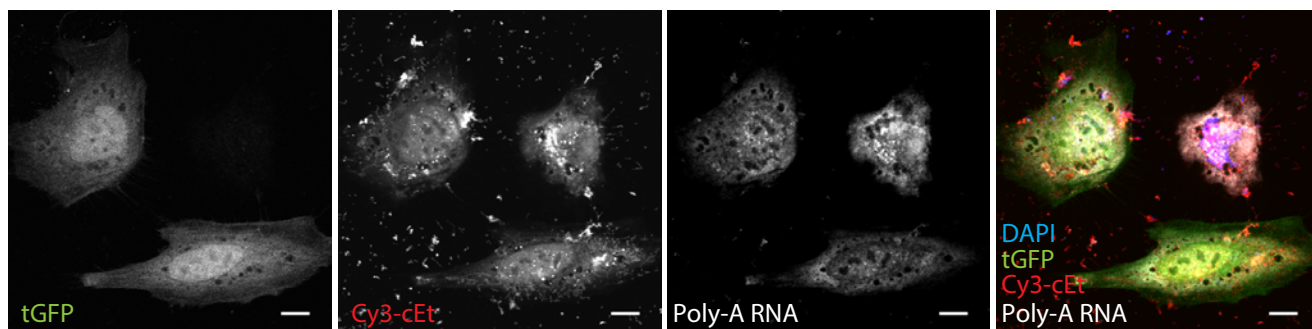

# Supplementary Figure 5

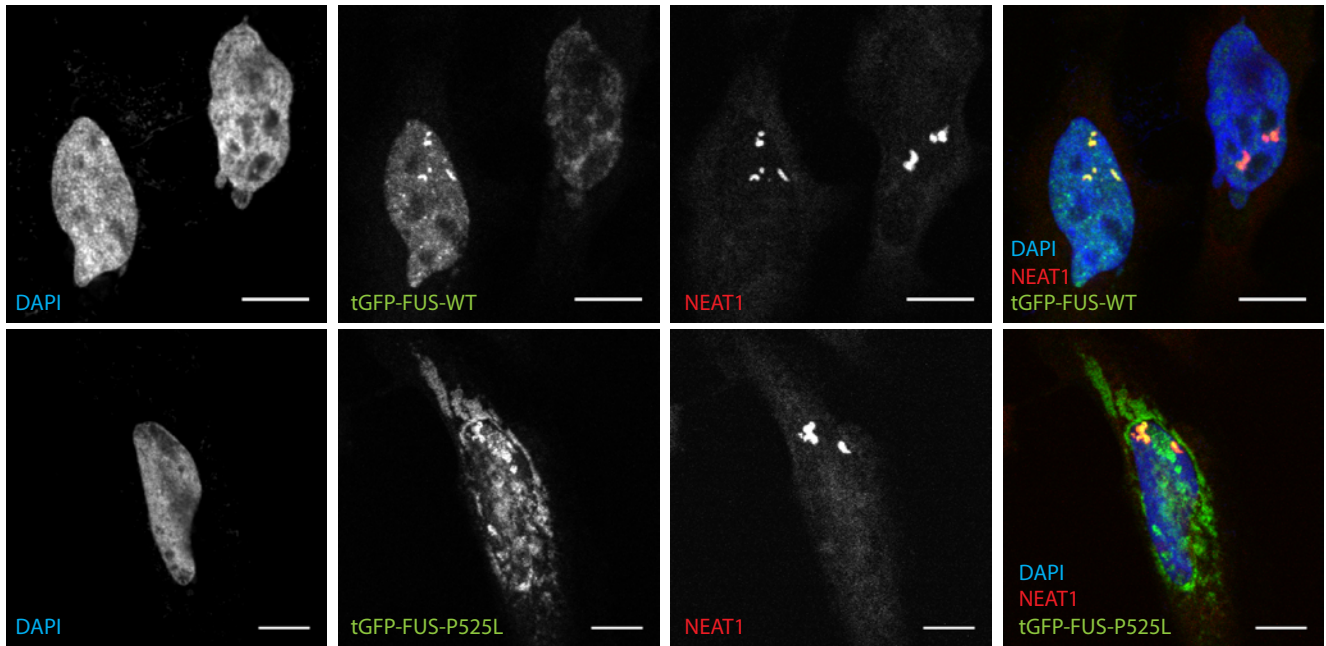

# Supplementary Figure 6

A

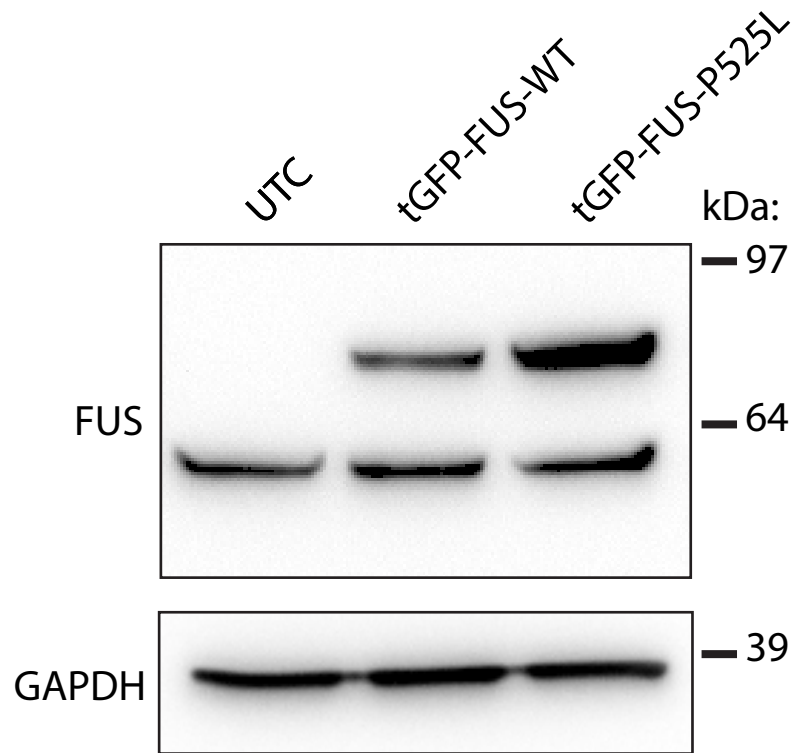

B

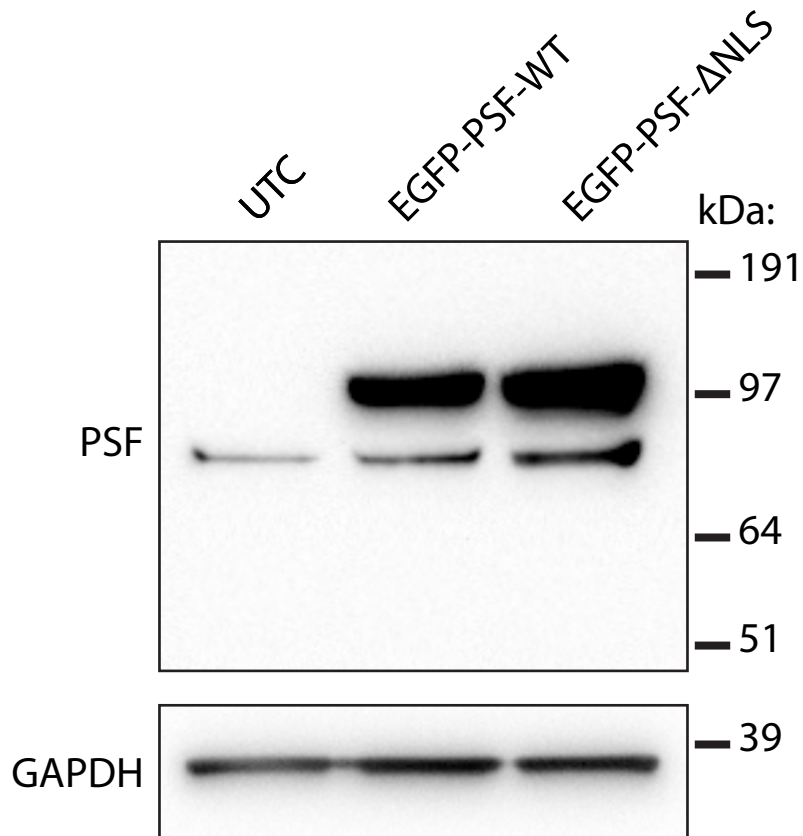

# Supplementary Figure 7

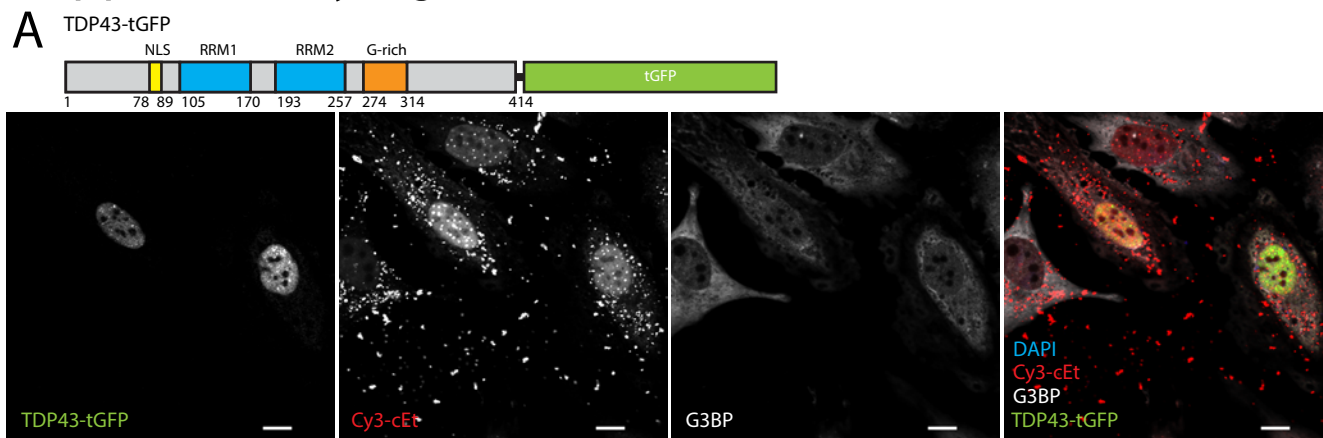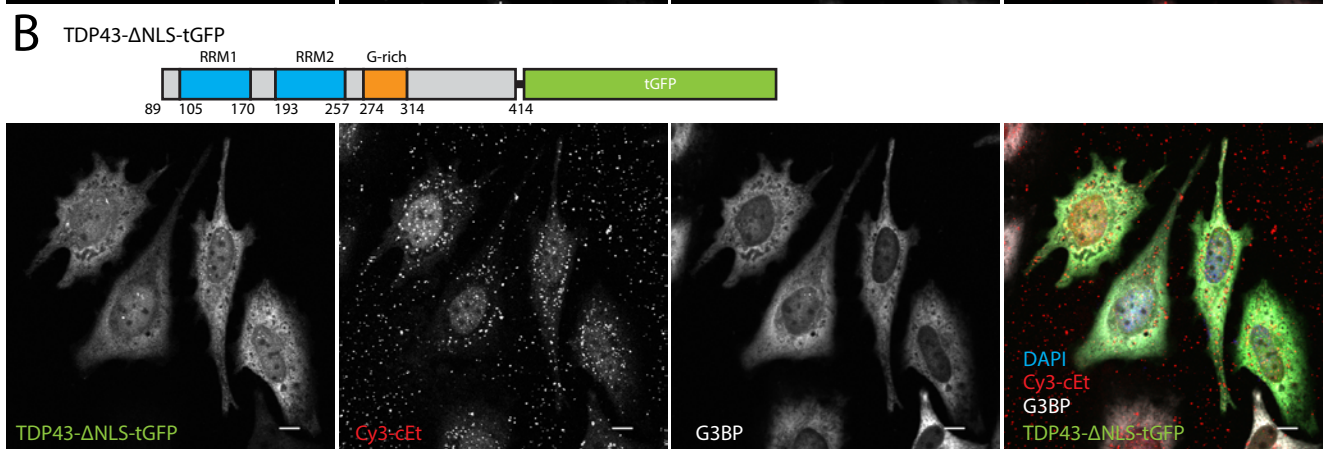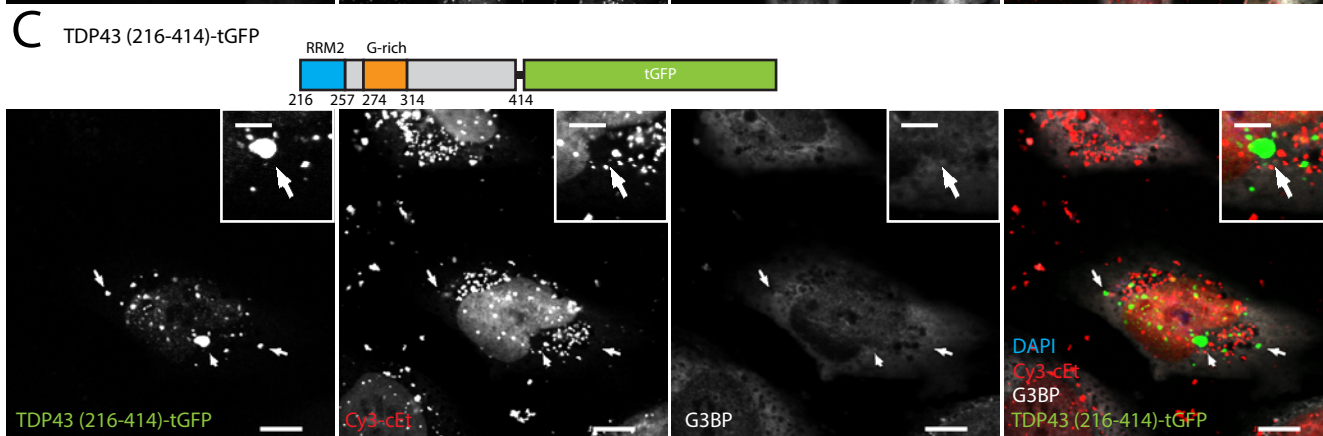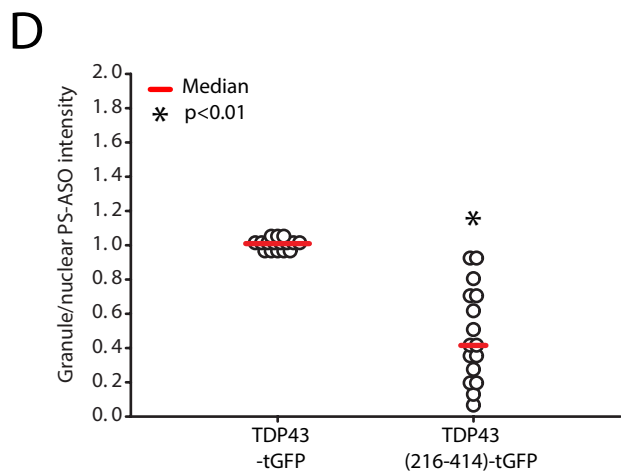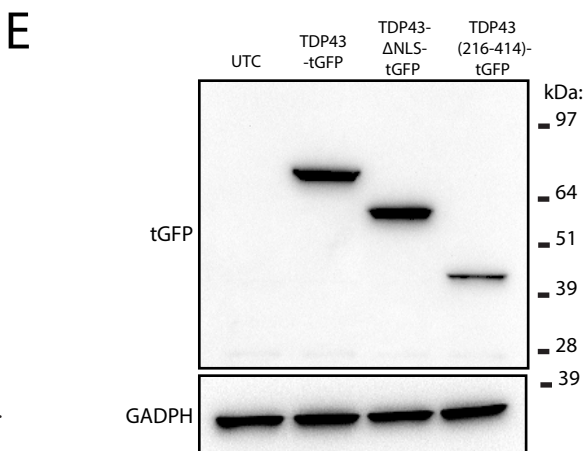

# Supplementary Figure 8

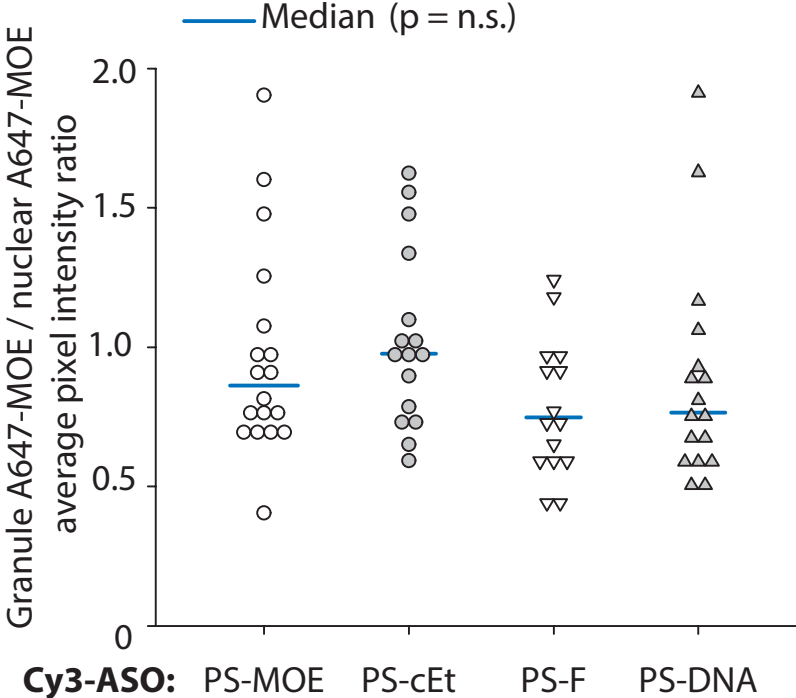



# Supplementary Figure 9

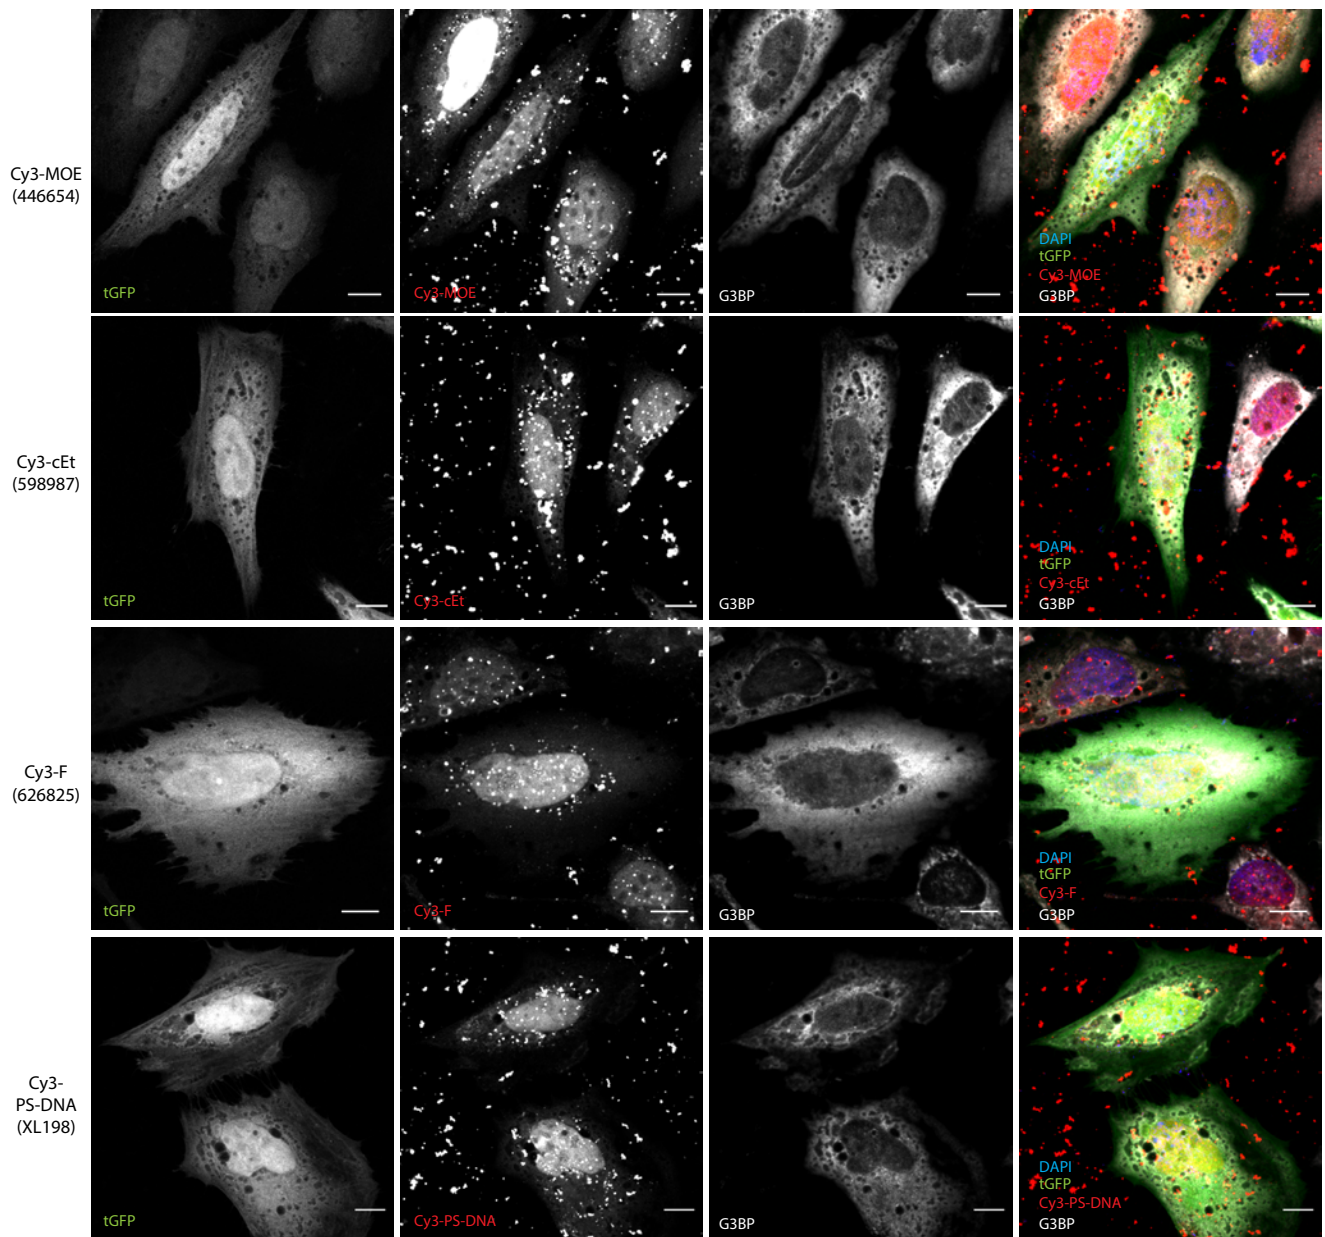

# Supplementary Figure 10

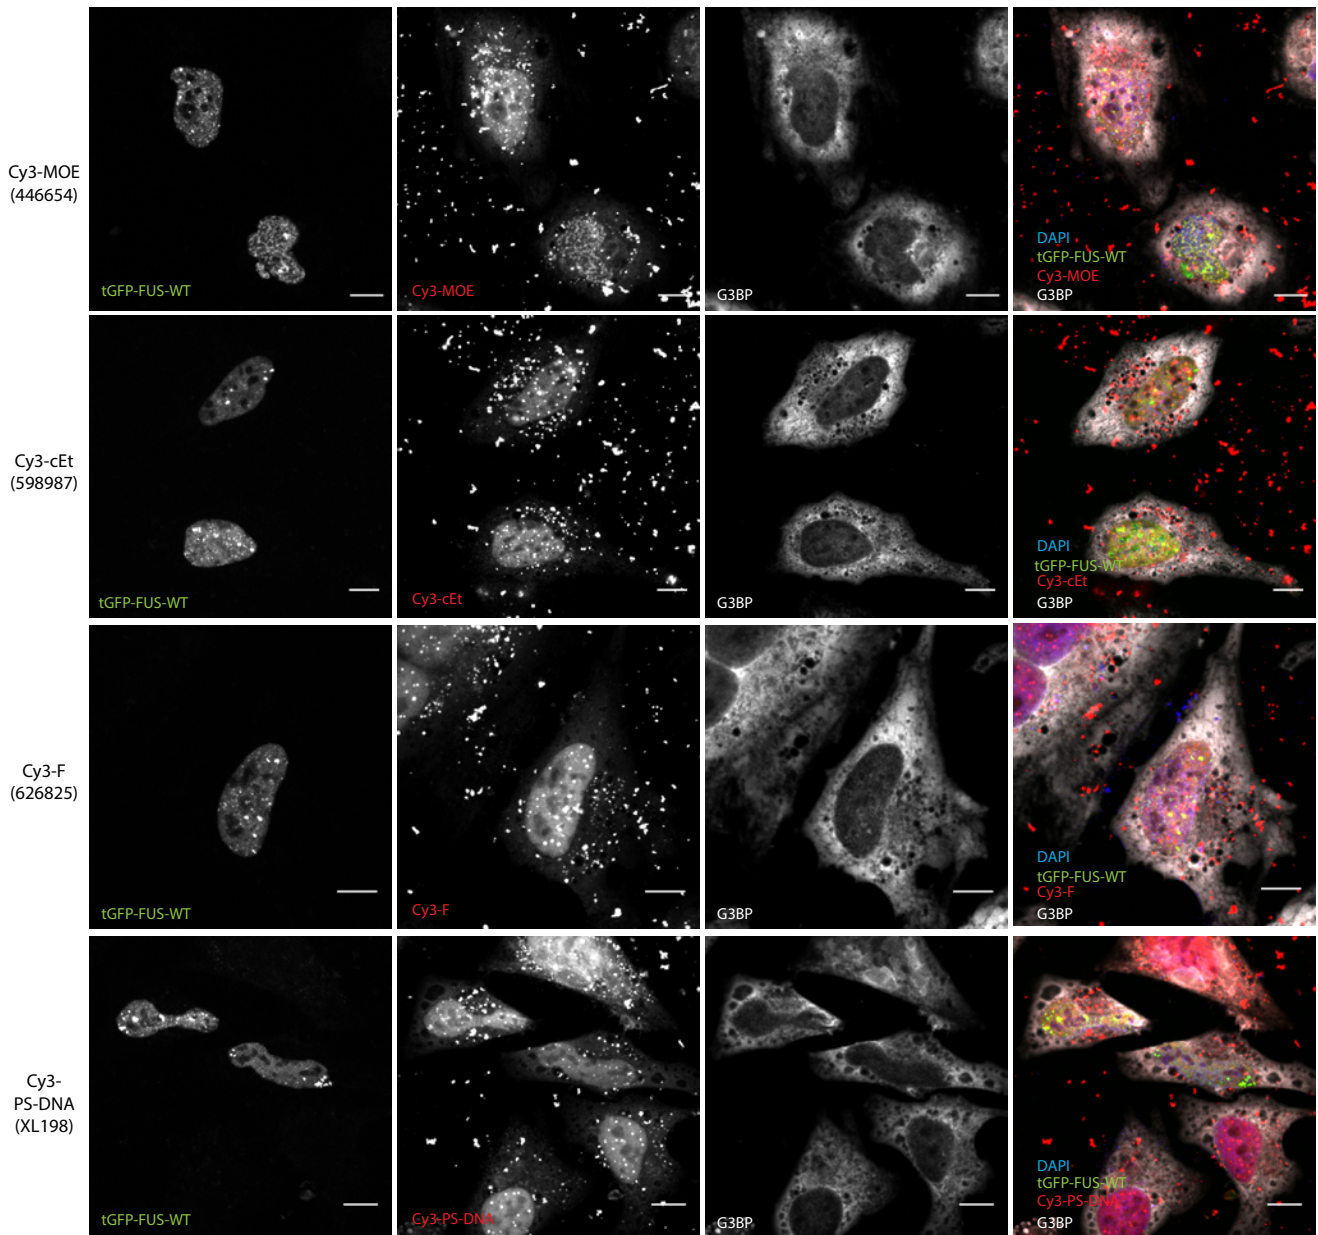

# Supplementary Figure 11

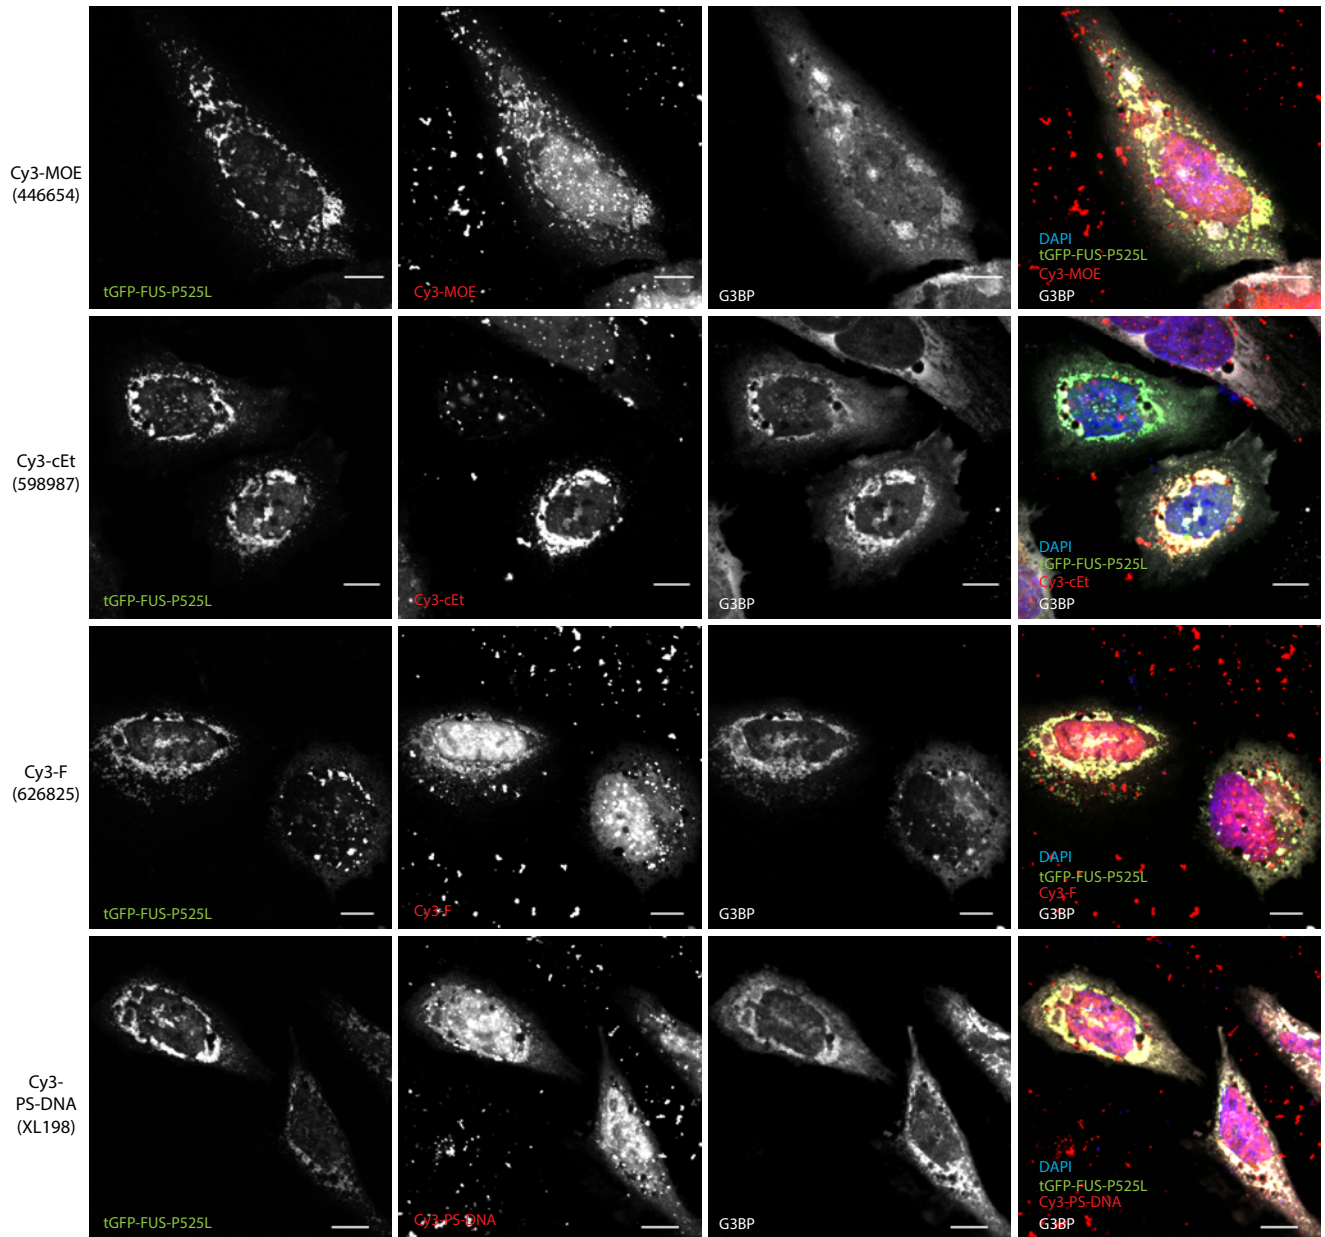

# Supplementary Figure 12

A

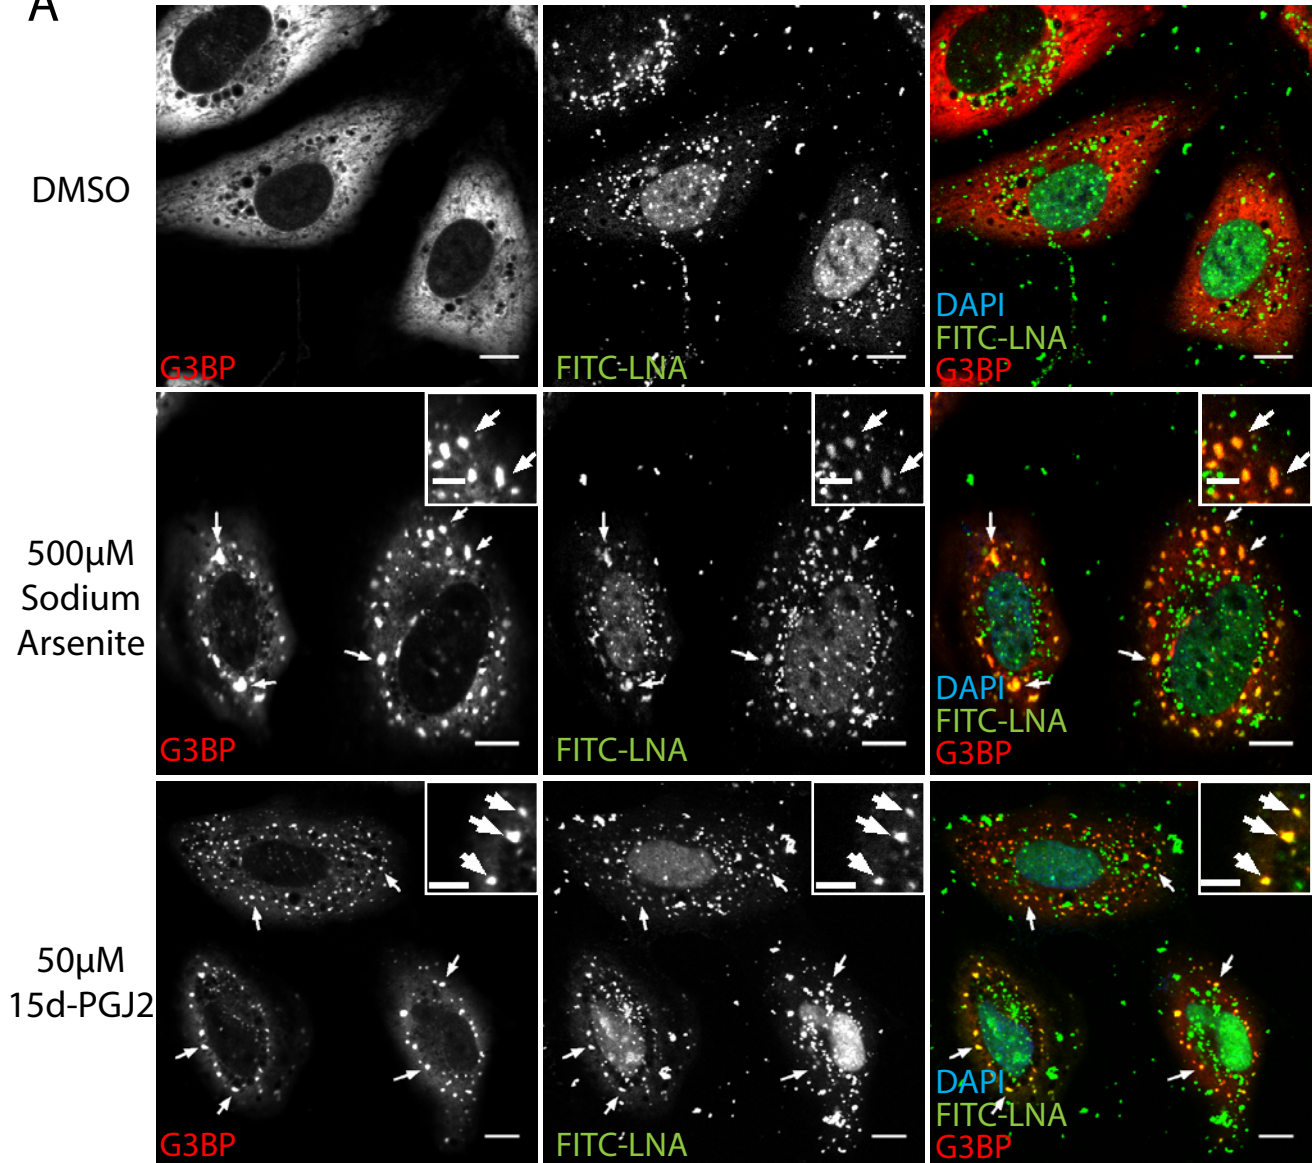

B

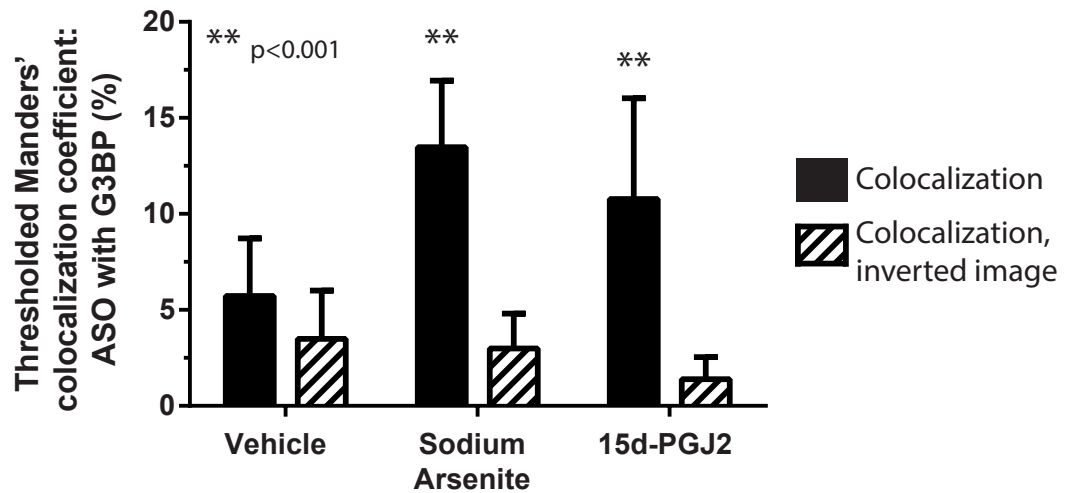

# Supplementary Figure 13

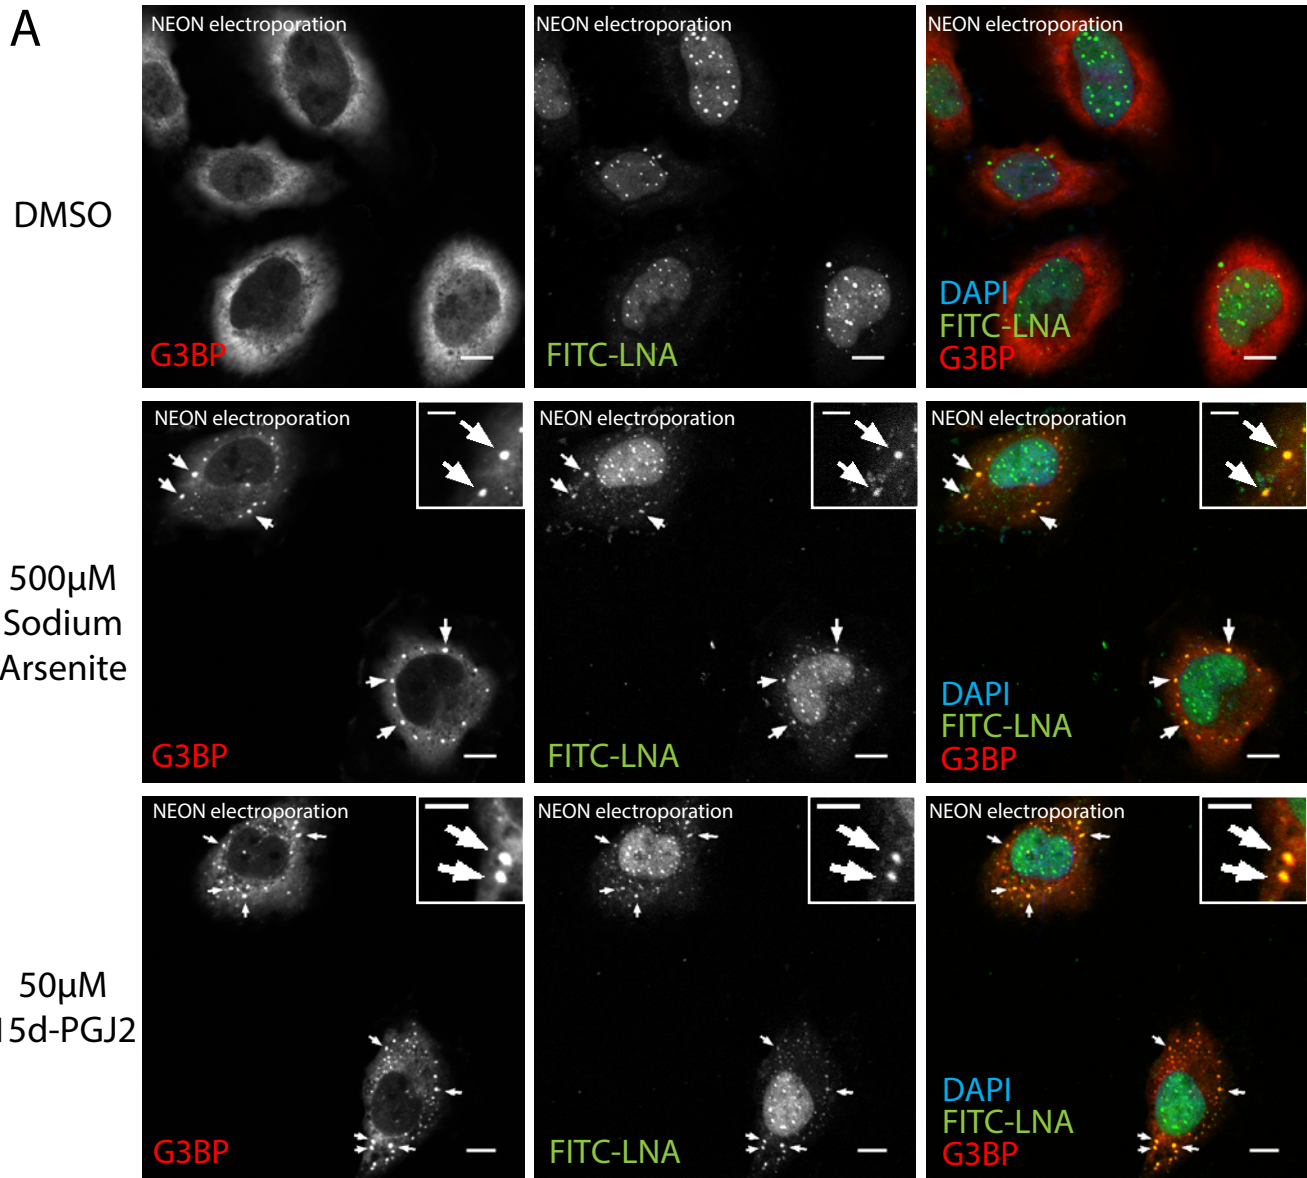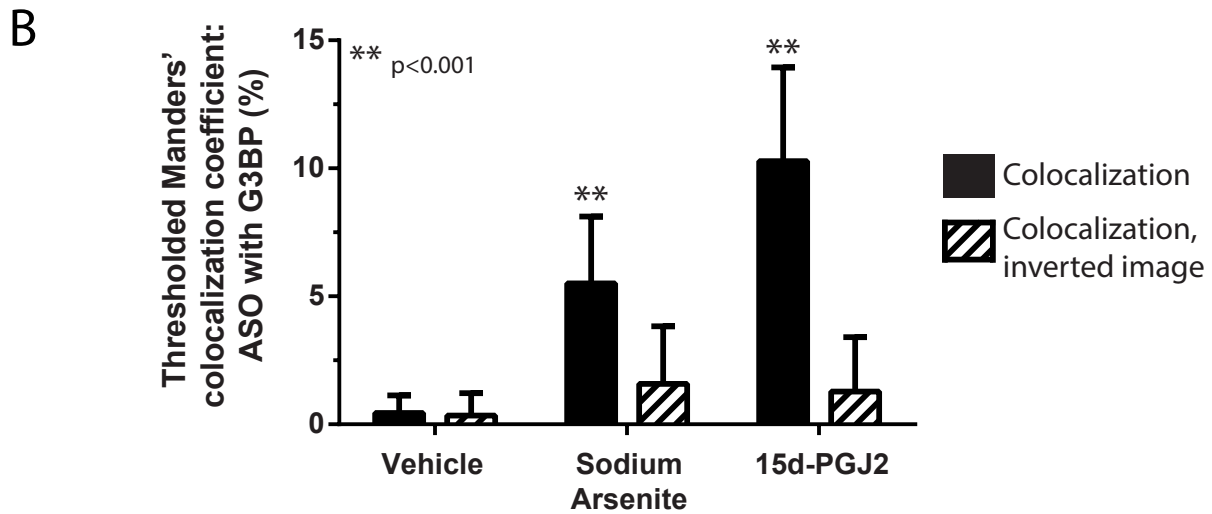

# Supplementary Figure 14

## A HA-FUS-WT

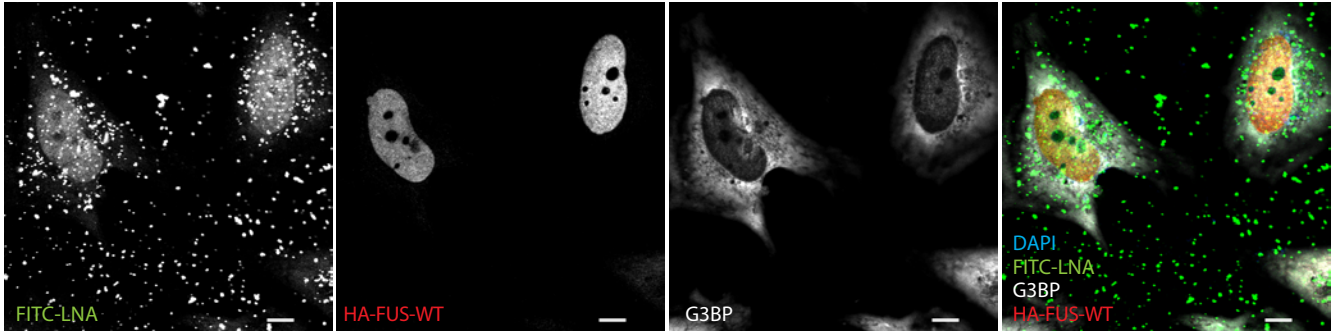

## B HA-FUS-P525L

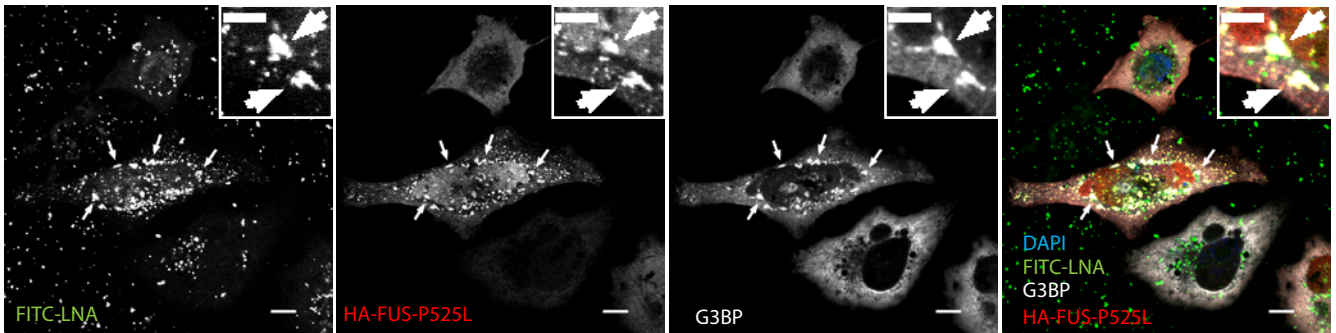

## C

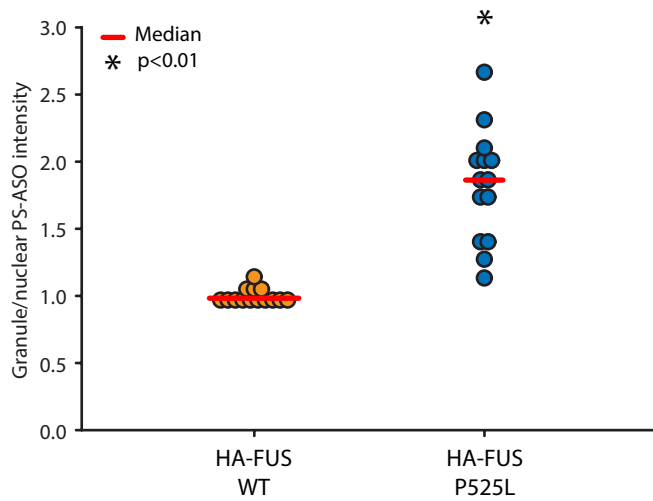

# Supplementary Figure 15

**A**

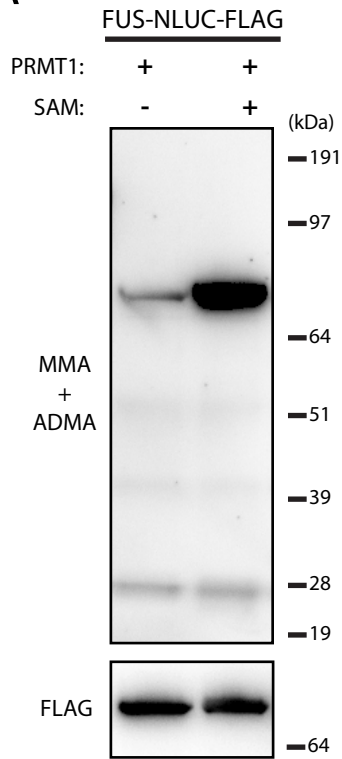

**B**

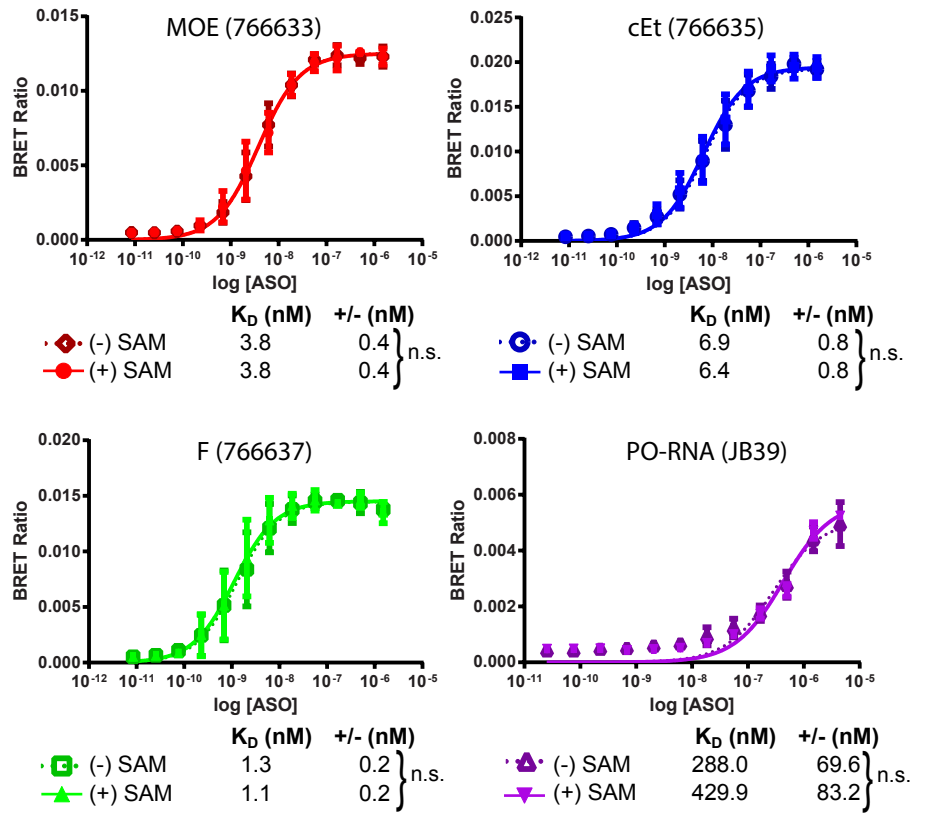

# Supplementary Figure 16

**A**

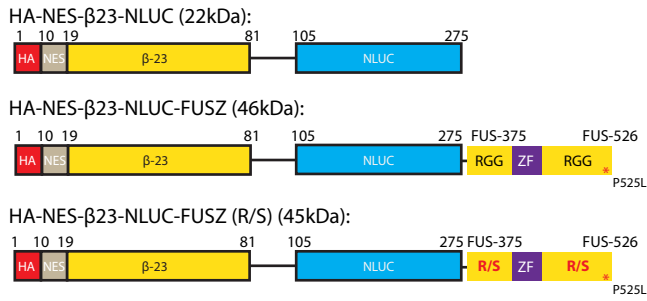

**B**

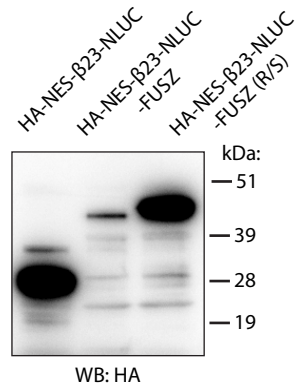

**C**

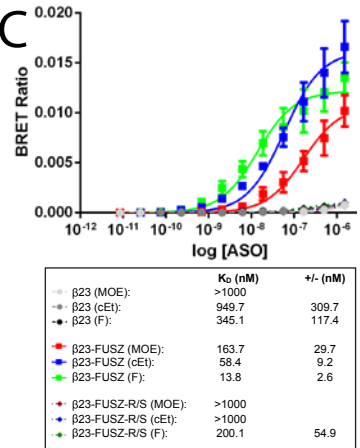



# Supplementary Figure 17

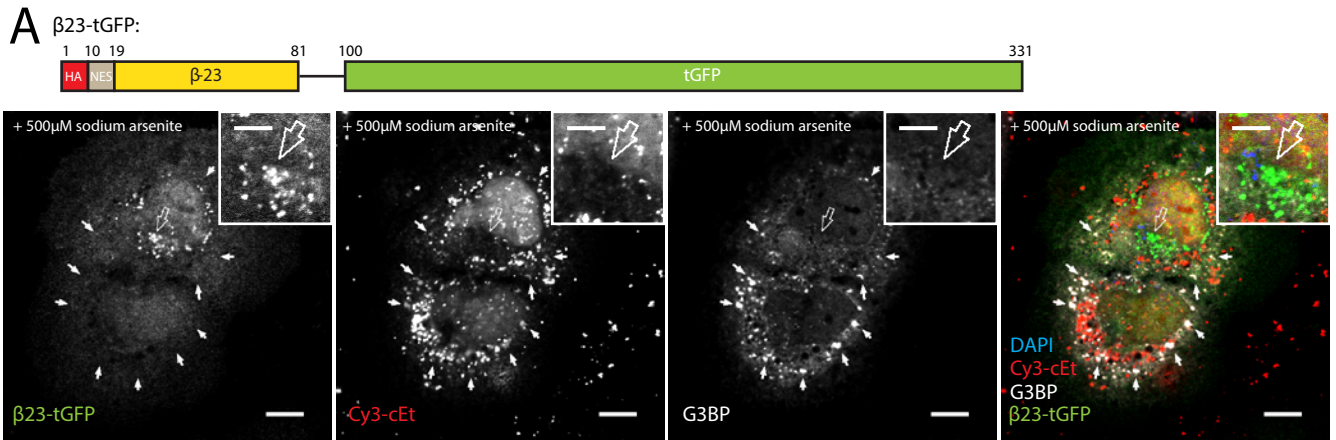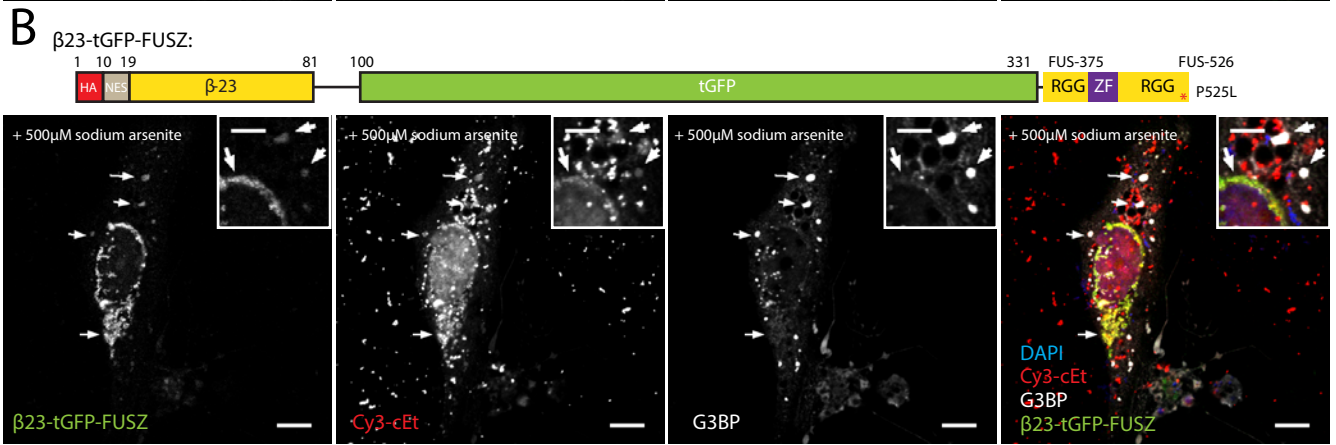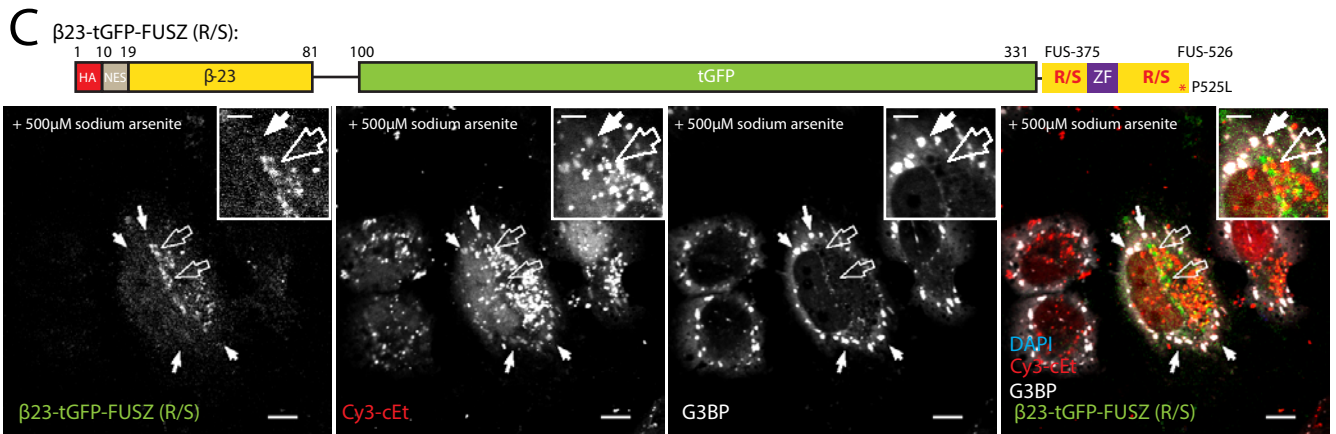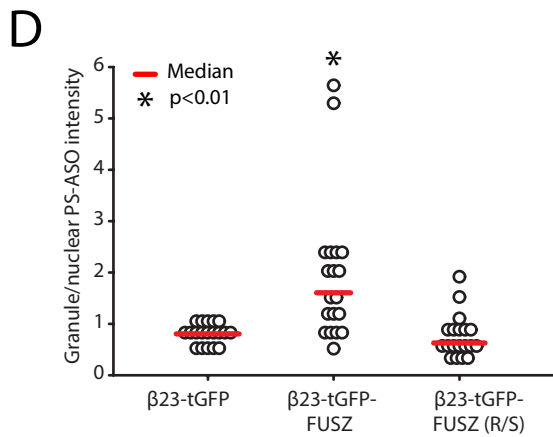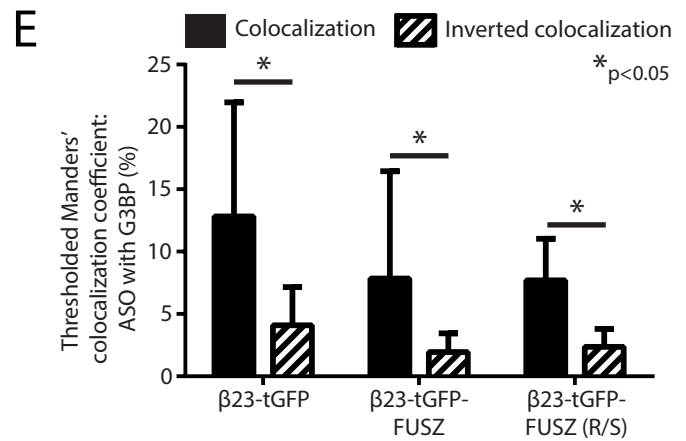

# Supplementary Figure 18

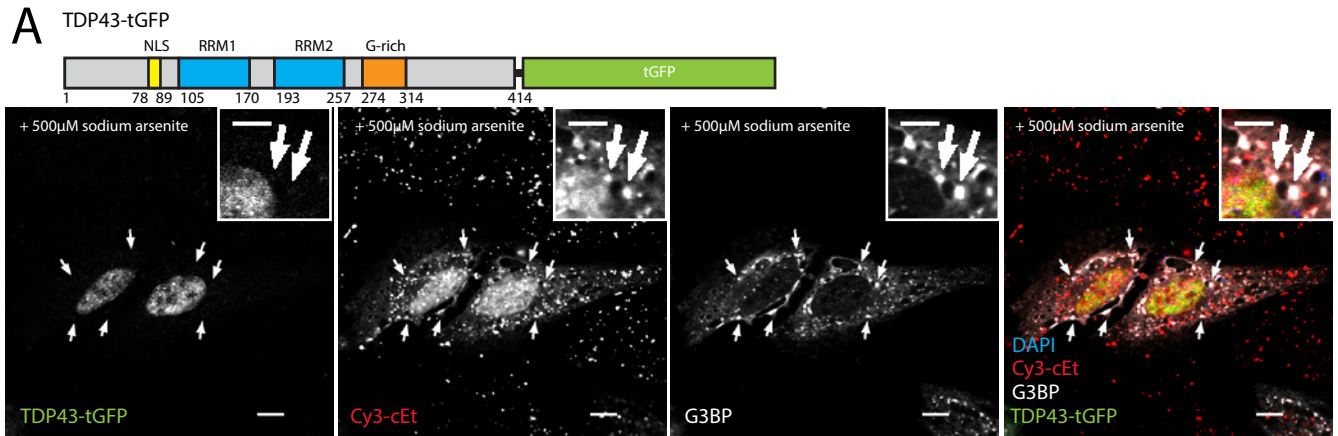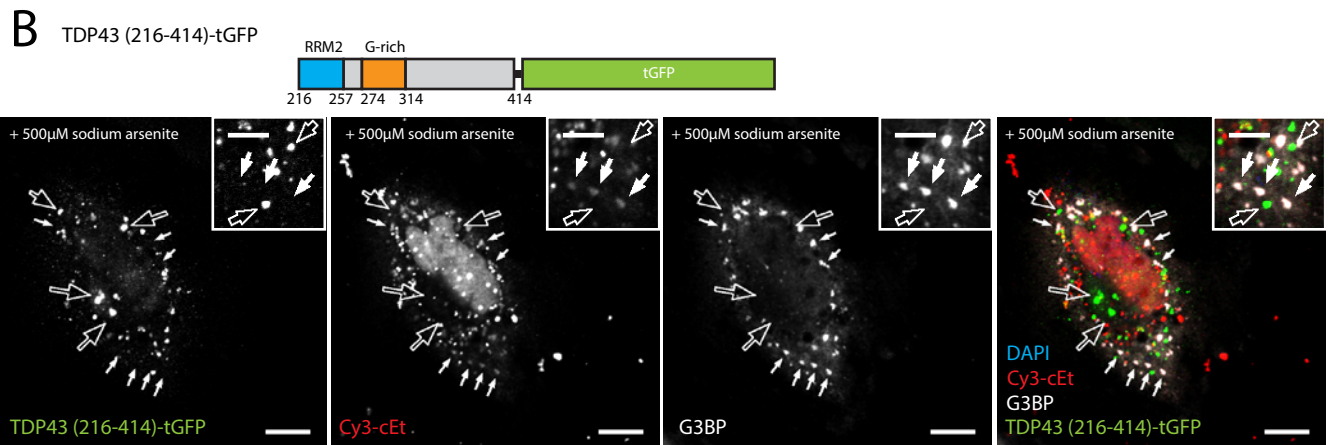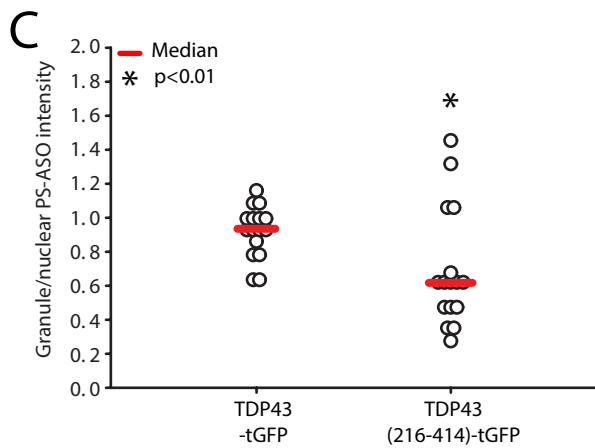

## SUPPLEMENTARY FIGURE LEGENDS

### **Supplementary Figure 1. Cy3-labeled cEt PS-ASO delivered by electroporation is recruited to endogenous stress granules.**

(A) Representative confocal immunofluorescence images of HeLa cells electroporated with a Cy3-labeled cEt PS-ASO (ION-950432) under control conditions (DMSO) and after incubation of cells with eIF2 $\alpha$ -dependent (sodium arsenite) or eIF2 $\alpha$ -independent (15d-PGJ2) stress granule inducers for 1 h. Scale bars, 10 $\mu$ m. Insert scale bars, 5 $\mu$ m. (B) Colocalization between the Cy3-labeled cEt PS-ASO and G3BP was quantified by the thresholded Manders' colocalization coefficient method(\*\* indicates  $p < 0.001$  vs. all other groups). Statistical analysis was performed using a univariate ANOVA with Tukey's HSD post hoc test ( $n = 15$  image fields per group), and error bars represent  $\pm$  S.D.

### **Supplementary Figure 2. cEt PS-ASO is recruited to cytoplasmic G3BP-positive granules in A431 cells stably expressing tGFP-FUS-P525L.**

Representative confocal immunofluorescence images of A431 cells stably transduced with lentiviral particles (MOI  $\sim 5$ ) containing tGFP alone, tGFP-FUS-WT, or tGFP-FUS-P525L. Scale bars, 10 $\mu$ m.

### **Supplementary Figure 3. Expression of HA-tagged FUS-P525L stimulates the recruitment of cEt PS-ASO to G3BP positive cytoplasmic granules.**

(A-B) Representative confocal immunofluorescence images of HeLa cells expressing HA-FUS-WT or HA-FUS-P525L. Cy3-labeled cEt PS-ASO (ION-598987) was transfected at 50 nM for 5 h. (C) ROI-based image quantification. Each data point represents one cell ( $n = 15$  cells per group), and statistical analysis was performed using the Kruskal-Wallis one-way analysis of variance (\* indicates  $p < 0.01$ ). (D) Western blot analysis confirmed the expression of the recombinant proteins. Endogenous FUS levels were not substantially affected by expression of either HA-tagged FUS construct. GAPDH is included as a loading control. Approximate molecular masses are noted at the right in kDa.

### **Supplementary Figure 4. Cytoplasmic aggregation of poly(A) RNA is not the result of**

**plasmid or cEt PS-ASO transfection.** (A) Representative confocal immunofluorescence images of poly(A) RNA in untreated cells (UTC) or cells expressing tGFP. (B) Representative confocal

immunofluorescence images of poly(A) RNA in HeLa cells expressing tGFP. Cells were transfected with Cy3 labeled cEt PS-ASO (50nM for 5hrs, ION-598987). Scale bars, 10 $\mu$ m.

**Supplementary Figure 5. Cytoplasmic tGFP-FUS-P525L granules do not recruit the *NEAT1* lncRNA.** Representative confocal immunofluorescence images of *NEAT1* lncRNA in HeLa cells transiently expressing tGFP-FUS-WT or tGFP-FUS-P525L. Scale bars, 10 $\mu$ m.

**Supplementary Figure 6. Expression of the tGFP-FUS and tGFP-PSF constructs does not substantially affect the levels of endogenous FUS or PSF, respectively.** (A-B) Western blot analysis confirmed the expression of the recombinant proteins and endogenous (A) FUS or (B) PSF. GAPDH is included as a loading control. Approximate molecular masses are noted at the right in kDa.

**Supplementary Figure 7. Cytoplasmic aggregates seeded by the TDP-43 C-terminal fragment do not recruit cEt PS-ASO.** (A-C) Representative confocal immunofluorescence images of transfected A594-labeled cEt PS-ASO (50 nM for 5 h, ION-766635, arrows) in HeLa cells expressing (A) TDP43-tGFP, (B) TDP43- $\Delta$ NLS-tGFP, or (C) TDP43(216-414)-tGFP. Scale bars, 10 $\mu$ m. Insert scale bars, 5 $\mu$ m. (D) ROI-based image quantification. Each data point represents one cell (n=16 cells per group), and statistical analysis was performed using the Kruskal-Wallis one-way analysis of variance (\* indicates p<0.01). (E) Western blot analysis confirmed the expression of the recombinant proteins. GAPDH is included as a loading control. Approximate molecular masses are noted at the right in kDa.

**Supplementary Figure 8. Granule/nuclear localization of A647-MOE PS-ASO is not significantly affected by equimolar co-transfection with various Cy3 PS-ASOs (50nM each).** This indicates that A647-MOE PS-ASO is a reliable signal intensity benchmark for Cy3-ASO normalization. Each data point represents one cell, and statistical analysis was performed using the Kruskal-Wallis one-way analysis of variance ( $\alpha$ <0.05).

**Supplementary Figure 9. Subcellular distribution of transfected PS-ASOs in cells expressing tGFP.** Representative confocal immunofluorescence images of transfected Cy3-

labeled ASOs of different 2' modifications (50 nM for 5 h, IONIS IDs are listed in the row headings) in HeLa cells expressing tGFP. Scale bars, 10 $\mu$ m.

**Supplementary Figure 10. Subcellular distribution of transfected PS-ASOs in cells expressing tGFP-FUS-WT.** Representative confocal immunofluorescence images of transfected Cy3-labeled ASOs of different 2' modifications (50 nM for 5 h, IONIS IDs are listed in the row headings) in HeLa cells expressing tGFP-FUS-WT. Scale bars, 10 $\mu$ m.

**Supplementary Figure 11. Transfected PS-ASOs and G3BP localize to cytoplasmic tGFP-FUS-P525L granules.** Representative confocal immunofluorescence images of transfected Cy3-labeled ASOs of different 2' modifications (50 nM for 5 h, IONIS IDs are listed in the row headings) in HeLa cells expressing tGFP-FUS-P525L. Scale bars, 10 $\mu$ m.

**Supplementary Figure 12. FITC-labeled LNA PS-ASO localizes to stress granules formed by two different stress granule inducers.** (A) Representative confocal immunofluorescence images of transfected FITC-labeled LNA PS-ASO (ION-391857, 50 nM for 5 h) in HeLa cells under control conditions (DMSO) and after incubation of cells with eIF2 $\alpha$ -dependent (sodium arsenite) or eIF2 $\alpha$ -independent (15d-PGJ2) stress granule inducers for 1 h. Scale bars, 10 $\mu$ m. Insert scale bars, 5 $\mu$ m. (B) Colocalization between the FITC-labeled LNA PS-ASO and G3BP was quantified by the thresholded Manders' colocalization coefficient method. (\*\* indicates  $p < 0.001$  vs. all other groups). Statistical analysis was performed using a univariate ANOVA with Tukey's HSD post hoc test ( $n = 15$  image fields per group), and error bars represent  $\pm$  S.D.

**Supplementary Figure 13. FITC-labeled LNA PS-ASO delivered by electroporation is recruited to endogenous stress granules.** (A) Representative confocal immunofluorescence images of HeLa cells electroporated with a FITC-labeled LNA PS-ASO (ION-391857) under control conditions (DMSO) and after incubation of cells with eIF2 $\alpha$ -dependent (sodium arsenite) or eIF2 $\alpha$ -independent (15d-PGJ2) stress granule inducers for 1 h. Scale bars, 10 $\mu$ m. Insert scale bars, 5 $\mu$ m. (B) Colocalization between the FITC-labeled LNA PS-ASO and G3BP was quantified by the thresholded Manders' colocalization coefficient method (\*\* indicates  $p < 0.001$  vs.

all other groups). Statistical analysis was performed using a univariate ANOVA with Tukey's HSD post hoc test (n=15 image fields per group), and error bars represent  $\pm$  S.D.

**Supplementary Figure 14. Expression of HA-tagged FUS-P525L recruits LNA PS-ASO to G3BP positive cytoplasmic granules.** (A, B) Representative confocal immunofluorescence images of HeLa cells transfected with a FITC-labeled LNA PS-ASO (ION-391857, 50 nM for 5 h) in cells expressing (A) HA-FUS-WT or (B) HA-FUS-P525L. (C) ROI-based image quantification. Each data point represents one cell (n=14 cells per group), and statistical analysis was performed using the Kruskal-Wallis one-way analysis of variance (\* indicates  $p < 0.01$ ).

**Supplementary Figure 15. PRMT1-mediated arginine methylation of FUS does not affect its PS-ASO binding properties.** (A) FUS with C-terminal Nanoluciferase and FLAG tags was *in vitro* transcribed and translated, methylated by protein arginine methyltransferase 1 (PRMT1) in the presence or absence of the essential methyl donor S-adenosyl methionine (SAM), and anti-FLAG affinity purified. Western blotting with a combination of anti-asymmetric dimethyl arginine and anti-mono methyl arginine antibodies confirmed the deposition of SAM-dependent arginine methylation on FUS-NLUC-FLAG. Approximate molecular masses are noted at the right in kDa. (B) NanoBRET binding assays with methylated (+SAM) and unmethylated (-SAM) FUS-NLUC-FLAG were performed for the following ASOs: MOE: ION-766633, cEt: ION-766635, F: ION-766637, PO-RNA: JB-39. Binding experiments were performed n=3 times per group and error bars represent  $\pm$  S.D. Relative  $K_D$  values are presented as average  $\pm$  S.D. Statistical analysis on the binding curve affinities ( $K_D$ ) and amplitudes ( $B_{max}$ ) was performed using the univariate ANOVA with Tukey's HSD post hoc.

**Supplementary Figure 16. The FUS-Z domain fused to the artificial  $\beta$ -sheet protein  $\beta$ 23 is sufficient to bind PS-ASOs *in vitro*.** (A) Schematic representation of three constructs: HA-NES- $\beta$ 23-NLUC, HA-NES- $\beta$ 23-NLUC-FUSZ, and HA-NES- $\beta$ 23-NLUC-FUSZ (R/S). (B) Western blot analysis confirmed the expression of the recombinant proteins. Approximate molecular masses are noted at the right in kDa. (C) NanoBRET binding assays for the  $\beta$ 23-fusion proteins were performed with A594-labeled PS-ASOs (MOE: ION-766633, cEt: ION-766635, F: ION-

766637). Binding experiments were performed in triplicate and error bars represent  $\pm$  S.D. Relative  $K_D$  values are presented as average  $\pm$  S.D.

**Supplementary Figure 17. Recruitment of cEt PS-ASO is a specific property of endogenous stress granules and cytoplasmic  $\beta$ 23-FUS-Z granules.** (A-C) Representative confocal immunofluorescence images of a transfected Cy3-labeled cEt PS-ASO (ION-598987, 50 nM for 5 h) in HeLa cells expressing (A)  $\beta$ 23-tGFP, (B)  $\beta$ 23-tGFP-FUSZ, or (C)  $\beta$ 23-tGFP-FUSZ (R/S). Cells were treated with 500  $\mu$ M sodium arsenite for 1 h. Scale bars, 10 $\mu$ m. Insert scale bars, 5 $\mu$ m. (D) The average granule/nuclear pixel intensity was measured using ROI-based image quantification. Each data point represents one cell (n=18-19 cells per group), and statistical analysis was performed using the Kruskal-Wallis one-way analysis of variance (\* indicates  $p < 0.01$ ). (E) Colocalization between the cEt PS-ASO and G3BP was quantified by the thresholded Manders' colocalization coefficient method (\* indicates  $p < 0.05$  vs. each corresponding inverted colocalization control). Statistical analysis was performed using a univariate ANOVA with Tukey's HSD post hoc test (n=18-19 cells per group), and error bars represent  $\pm$  S.D.

**Supplementary Figure 18. Endogenous stress granules but not TDP43 C-terminal aggregates recruit cEt PS-ASO within the same cell** (A, B) Representative confocal immunofluorescence images of a transfected Cy3-labeled cEt PS-ASO (ION-598987, 50 nM for 5 h) in HeLa cells expressing (A) TDP43-tGFP or (B) TDP43 (216-414)-tGFP. Cells were treated with 500  $\mu$ M sodium arsenite for 1 h. (C) The average granule/nuclear pixel intensity was measured using ROI-based image quantification. Each data point represents one cell (n=16 cells per group), and statistical analysis was performed using the Kruskal-Wallis one-way analysis of variance (\* indicates  $p < 0.01$ ).

**Supplementary Table 1: DNA plasmid constructs**

| <b>Expression Plasmids and Cloning Information</b> |                                                         |                                    |                |                |                 |                   |
|----------------------------------------------------|---------------------------------------------------------|------------------------------------|----------------|----------------|-----------------|-------------------|
| <b>Name</b>                                        | <b>Template/<br/>Source</b>                             | <b>Destination</b>                 | <b>5' Site</b> | <b>3' Site</b> | <b>Method</b>   | <b>Tag</b>        |
| pCMV6-AN-tGFP-FUS-WT                               | Origene (RG201808)                                      | pCMV6-AN-tGFP (Origene, PS100019)  | AsiSI          | PmeI           | PCR (JB1,JB2)   | tGFP (N-terminal) |
| pCMV6-AN-tGFP-FUS-P525L                            | Origene (RG201808), Site-directed mutagenesis (JB3,JB4) | pCMV6-AN-tGFP (Origene, PS100019)  | AsiSI          | PmeI           | PCR (JB1,JB5)   | tGFP (N-terminal) |
| pCMV6-HA-FUS-WT                                    | Annealed insert (JB43, JB44)                            | pCMV6-AN-tGFP-FUS-WT               | BamHI          | AsiSI          | Subcloning      | HA (N-terminal)   |
| pCMV6-HA-FUS-P525L                                 | Annealed insert (JB43, JB44)                            | pCMV6-AN-tGFP-FUS-P525L            | BamHI          | AsiSI          | Subcloning      | HA (N-terminal)   |
| EGFP-PSF-WT                                        | Genscript (OHu23607C)                                   | pcDNA3.1-N-EGFP                    | KpnI           | XhoI           | Purchased       | EGFP (N-terminal) |
| EGFP-PSF-ΔNLS                                      | Genscript (OHu23607M)                                   | pcDNA3.1-N-EGFP                    | KpnI           | XhoI           | Purchased       | EGFP (N-terminal) |
| NLUC-HA                                            | NEB-IVT-YBX1-NLUC-HA (unpublished)                      | NEB-IVT                            | NdeI           | BlnI           | PCR (JB6,JB7)   | HA (C-terminal)   |
| NEB-NLUC                                           | pFN31K-NLUC-P54nrb (Vickers and Crooke, 2016)           | NEB-IVT                            | NdeI           | XhoI           | PCR (JB8,JB9)   | None              |
| NEB-NLUC-FUS-HA (N-term NLUC)                      | pCMV6-AN-tGFP-FUS-P525L                                 | NEB-NLUC                           | XhoI           | BlnI           | PCR (JB10,JB11) | HA (C-terminal)   |
| NEB-FUS-NLUC-HA (C-term NLUC)                      | pCMV6-AN-tGFP-FUS-P525L                                 | NEB-IVT-YBX1-NLUC-HA (unpublished) | NdeI           | XhoI           | PCR (JB12,JB13) | HA (C-terminal)   |
| NEB-FUS-N-NLUC-HA                                  | pCMV6-AN-tGFP-FUS-P525L                                 | NEB-IVT-YBX1-NLUC-HA (unpublished) | NdeI           | XhoI           | PCR (JB12,JB14) | HA (C-terminal)   |
| NEB-FUS-NR-NLUC-HA                                 | pCMV6-AN-tGFP-FUS-P525L                                 | NEB-IVT-YBX1-NLUC-HA               | NdeI           | XhoI           | PCR (JB12,JB15) | HA (C-terminal)   |



|                             |                                                                                      |                                    |                                       |                             |                                                |                   |
|-----------------------------|--------------------------------------------------------------------------------------|------------------------------------|---------------------------------------|-----------------------------|------------------------------------------------|-------------------|
|                             |                                                                                      | (unpublished)                      |                                       |                             |                                                |                   |
| NEB-FUS-RRM-NLUC-HA         | pCMV6-AN-tGFP-FUS-P525L                                                              | NEB-IVT-YBX1-NLUC-HA (unpublished) | NdeI                                  | XhoI                        | PCR (JB15,JB16)                                | HA (C-terminal)   |
| NEB-FUS-Z-NLUC-HA           | pCMV6-AN-tGFP-FUS-P525L                                                              | NEB-IVT-YBX1-NLUC-HA (unpublished) | NdeI                                  | XhoI                        | PCR (JB13,JB17)                                | HA (C-terminal)   |
| NEB-FUS-NLUC-FLAG           | I1: pCMV6-AN-tGFP-FUS-P525L<br><br>I2: pFN31K-NLUC-P54nrb (Vickers and Crooke, 2016) | NEB-IVT                            | I1: NdeI<br><br>I2: NotI              | I1: NotI<br><br>I2: BlnI    | I1: PCR (JB12,JB18)<br><br>I2: PCR (JB19,JB20) | FLAG (C-terminal) |
| NEB-FUS-ΔZF-NLUC-FLAG       | I1: NEB-FUS-NLUC-FLAG<br><br>I2: NEB-FUS-NLUC-FLAG                                   | NEB-FUS-NLUC-FLAG                  | I1: NdeI<br><br>I2: PmeI (blunt)      | I1: (blunt)<br><br>I2: NotI | I1: PCR (JB12,JB21)<br><br>I2: PCR (JB22,JB23) | FLAG (C-terminal) |
| NEB-FUS-R/S-NLUC-FLAG       | FUS-R/S gBlock (IDT)                                                                 | NEB-FUS-ΔZF-NLUC-FLAG              | EcoRI                                 | NotI                        | PCR (JB24,JB25)                                | FLAG (C-terminal) |
| pLVX-tGFP                   | pCMV6-AN-tGFP (Origene, PS100019)                                                    | pLVX-IRES-Puro (Clontech, 632183)  | V: XhoI/Klenow<br><br>I: BamHI/Klenow | NotI                        | Subcloning                                     | None              |
| pLVX-tGFP-FUS-WT            | pCMV6-AN-tGFP-FUS-WT                                                                 | pLVX-IRES-Puro (Clontech, 632183)  | V: XhoI/Klenow<br><br>I: BamHI/Klenow | NotI                        | Subcloning                                     | tGFP (N-terminal) |
| pLVX-tGFP-FUS-P525L         | pCMV6-AN-tGFP-FUS-P525L                                                              | pLVX-IRES-Puro (Clontech, 632183)  | V: XhoI/Klenow<br><br>I: BamHI/Klenow | NotI                        | Subcloning                                     | tGFP (N-terminal) |
| pCMV6-AC-HA-NES-β23-tGFP    | HA-NES-β23 gBlock (IDT)                                                              | pCMV6-AC-tGFP (Origene, PS100010)  | BamHI                                 | XhoI                        | PCR (JB26,JB27)                                | (Multiple)        |
| HA-NES-β23-tGFP-FUS-Z (WT)  | pCMV6-AN-tGFP-FUS-Z (WT) (unpublished)                                               | pCMV6-AC-HA-NES-β23-tGFP           | PspOMI                                | PmeI                        | Subcloning                                     | (Multiple)        |
| HA-NES-β23-tGFP-FUS-Z (R/S) | pCMV6-AN-tGFP-FUS-Z (R/S) (unpublished)                                              | pCMV6-AC-HA-NES-β23-tGFP           | PspOMI                                | PmeI                        | Subcloning                                     | (Multiple)        |

|                                         |                                       |                                    |       |         |                  |                   |
|-----------------------------------------|---------------------------------------|------------------------------------|-------|---------|------------------|-------------------|
| NEB-HA-NES- $\beta$ 23-NLUC             | HA-NES- $\beta$ 23 gBlock (IDT)       | NEB-FUS-NLUC-FLAG                  | NdeI  | NotI    | PCR (JB28,JB29)  | HA (N-terminal)   |
| NEB-HA-NES- $\beta$ 23-NLUC-FUS-Z (WT)  | NEB-HA-NLUC-FUS-Z (WT) (unpublished)  | NEB-HA-NES- $\beta$ 23-NLUC        | XapI  | HindIII | Subcloning       | HA (N-terminal)   |
| NEB-HA-NES- $\beta$ 23-NLUC-FUS-Z (R/S) | NEB-HA-NLUC-FUS-Z (R/S) (unpublished) | NEB-HA-NES- $\beta$ 23-NLUC        | XapI  | HindIII | Subcloning       | HA (N-terminal)   |
| NEB-FUSZ-NT-RGG-NLUC-HA                 | pCMV6-AN-tGFP-FUS-P525L               | NEB-IVT-YBX1-NLUC-HA (unpublished) | NdeI  | XhoI    | PCR (JB17,JB30)  | HA (C-terminal)   |
| NEB-FUSZ-CT-RGG-NLUC-HA                 | pCMV6-AN-tGFP-FUS-P525L               | NEB-IVT-YBX1-NLUC-HA (unpublished) | NdeI  | XhoI    | PCR (JB13,JB31)  | HA (C-terminal)   |
| NEB-FUSZ-NT (R/S)-NLUC-HA               | FUSZ-NT(R/S) gBlock                   | NEB-IVT-YBX1-NLUC-HA (unpublished) | NdeI  | XhoI    | PCR (JB32,JB33)  | HA (C-terminal)   |
| NEB-FUSZ-CT (R/S)-NLUC-HA               | FUSZ-CT(R/S) gBlock                   | NEB-IVT-YBX1-NLUC-HA (unpublished) | NdeI  | XhoI    | PCR (JB34,JB35)  | HA (C-terminal)   |
| NEB-FUS-R1-NLUC-HA                      | pCMV6-AN-tGFP-FUS-WT                  | NEB-IVT-YBX1-NLUC-HA (unpublished) | NdeI  | XhoI    | PCR (JB45, JB15) | HA (C-terminal)   |
| NEB-FUS-R2-NLUC-HA                      | pCMV6-AN-tGFP-FUS-WT                  | NEB-IVT-YBX1-NLUC-HA (unpublished) | NdeI  | XhoI    | PCR (JB46, JB15) | HA (C-terminal)   |
| pCMV6-AC-TDP43-tGFP                     | Origene (RG210639)                    | -                                  | SgfI  | MluI    | Purchased        | tGFP (C-terminal) |
| pCMV6-AC-TDP43 ( $\Delta$ NLS)-tGFP     | Origene (RG210639)                    | pCMV6-AC-tGFP                      | BamHI | NotI    | PCR (JB36,JB37)  | tGFP (C-terminal) |
| pCMV6-AC-TDP43 (216-414)-tGFP           | Origene (RG210639)                    | pCMV6-AC-tGFP                      | BamHI | NotI    | PCR (JB37,JB38)  | tGFP (C-terminal) |

**Supplementary Table 2: Cloning primers**

| Primers |          |           |
|---------|----------|-----------|
| Name    | Sequence | Construct |

|      |                                                                             |                     |
|------|-----------------------------------------------------------------------------|---------------------|
| JB1  | 5'-CATCATGCGATCGCCATGGCCTCAAACG-3'                                          | tGFP-FUS-WT         |
| JB2  | 5'-CATCATGCGGCCGCTTAATACGGCCTCTCCCTGCGATC-3'                                | tGFP-FUS-WT         |
| JB3  | 5'-GATCGCAGGGAGAGGCTGTATACGCGTACGCGG-3'                                     | tGFP-FUS-P525L      |
| JB4  | 5'-CCGCGTACGCGTATACAGCCTCTCCCTGCGATC-3'                                     | tGFP-FUS-P525L      |
| JB5  | 5'-CATCATGCGGCCGCTTAATACAGCCTCTCCCTGCGATC-3'                                | tGFP-FUS-P525L      |
| JB6  | 5'-CATCATCATATGGTCTTCACACTCGAAGATTTGTTGG-3'                                 | NLUC-HA             |
| JB7  | 5'-CATCATGCTCAGCTTAAGCGTAATCTGGAACATCGTATGGGTAC-3'                          | NLUC-HA             |
| JB8  | 5'-CATCATCATATGGTCTTCACACTCGAAGATTTGTTGGG-3'                                | NEB-NLUC            |
| JB9  | 5'-CTGCATGGCGATCGCGGCG-3'                                                   | NEB-NLUC            |
| JB10 | 5'-CATCATCTCGAGCATGGCCTCAAACGATTATAC-3'                                     | NEB-NLUC-FUS-HA     |
| JB11 | 5'-CATCATGCTCAGCTTAAGCGTAATCTGGAACATCGTATGGGTAATACAGCCTCTCCCTGCGATCCTGTC-3' | NEB-NLUC-FUS-HA     |
| JB12 | 5'-CATCATCATATGGCCTCAAACGATTATACCCAACAAGC-3'                                | (Multiple)          |
| JB13 | 5'-CATCATCTCGAGATACAGCCTCTCCCTGCGATCC-3'                                    | (Multiple)          |
| JB14 | 5'-CATCATCTCGAGGTCTGAATTATCCTGTTCCGGAGTCATGACGTG-3'                         | NEB-FUS-NLUC-HA     |
| JB15 | 5'-CATCATCTCGAGAAAGTCTGCCCGGCGAGTAG-3'                                      | (Multiple)          |
| JB16 | 5'-CATCATCATATGAGCAACAACACCATCTTTGTGCAAGG-3'                                | NEB-FUS-RRM-NLUC-HA |
| JB17 | 5'-CATCATCATATGAGCAATCGGGGTGGTGGCAATG-3'                                    | (Multiple)          |
| JB18 | 5'-TCTCGAGCGGCCGCGTAC-3'                                                    | NEB-FUS-NLUC-FLAG   |
| JB19 | 5'-CATCATGCGGCCGCTGATGGTCTTCACACTCGAAGATTTGTTGGG-3'                         | NEB-FUS-NLUC-FLAG   |
| JB20 | 5'-CATCATGCTCAGCTTACTTATCGTCGTATCCTTGTAAATCCGCCAGATGCGTTTCGCACAG-3'         | NEB-FUS-NLUC-FLAG   |

|      |                                                                      |                                       |
|------|----------------------------------------------------------------------|---------------------------------------|
| JB21 | 5'-TCGCTGCTGTCCTCCACCGCCAC-3'                                        | NEB-FUS-<br>ΔZF-NLUC-<br>FLAG         |
| JB22 | 5'-CATCATGTTTAAACACCCAGGAGGGGGACCAGGTG-3'                            | NEB-FUS-<br>ΔZF-NLUC-<br>FLAG         |
| JB23 | 5'-CATCATGCGGCCGCGTACGCGTATAC-3'                                     | NEB-FUS-<br>ΔZF-NLUC-<br>FLAG         |
| JB24 | 5'-GGTAAAGAATTCTCCGAAATCCGATAAAGGTG-3'                               | NEB-FUS-<br>R/S-NLUC-<br>FLAG         |
| JB25 | 5'-GCATCAGCGGCCGCGTAC-3'                                             | NEB-FUS-<br>R/S-NLUC-<br>FLAG         |
| JB26 | 5'-CATCATGGATCCGCCACCATGGACC-3'                                      | (Multiple)                            |
| JB27 | 5'-ATGATGCTCGAGGGCGGCG-3'                                            | (Multiple)                            |
| JB28 | 5'-CATCATCATATGGCCACCATGGACCAGTACCCATACG-3'                          | NEB-HA-NES-<br>β23-NLUC               |
| JB29 | 5'-CATCATGCGGCCGCGAGATGCTCGAGGGCGGCG-3'                              | NEB-HA-NES-<br>β23-NLUC               |
| JB30 | 5'-CATCATCTCGAGCTGCTGTCCTCCACCGCCA-3'                                | NEB-FUSZ-<br>NT-RGG-<br>NLUC-HA       |
| JB31 | 5'-ATCCATCATATGCCAGGAGGGGGACCAGGTG-3'                                | NEB-FUSZ-<br>CT-RGG-<br>NLUC-HA       |
| JB32 | 5'-ACTCATCATATGAACTCCGGCGGCGGTAATG-3'                                | NEB-FUSZ-<br>NT (R/S)-<br>NLUC-HA     |
| JB33 | 5'-CATCATCTCGAGGTATAAACGCTCGCGACGATCCTG-3'                           | NEB-FUSZ-<br>NT (R/S)-<br>NLUC-HA     |
| JB34 | 5'-ACTCATCATATGAACCGTGGCGGAGGTAACG-3'                                | NEB-FUSZ-<br>CT (R/S)-<br>NLUC-HA     |
| JB35 | 5'-CATCATCTCGAGATAAAGGGACTCGGAACTATCCTGGGAATG-3'                     | NEB-FUSZ-<br>CT (R/S)-<br>NLUC-HA     |
| JB36 | 5'-<br>CATCATGGATCCGCCACCATGGATGCTTCATCAGCAGTGAAAGTGA<br>AAAGAGC-3'  | pCMV6-AC-<br>TDP43<br>(ΔNLS)-tGFP     |
| JB37 | 5'-CATCATGCGGCCGCGTACGCGTCATTC-3'                                    | (Multiple)                            |
| JB38 | 5'-<br>CATCATGGATCCGCCACCATGGATGTGATGGATGTCTTCATCCCCA<br>AGCCATTC-3' | pCMV6-AC-<br>TDP43 (216-<br>414)-tGFP |
| JB43 | 5'-GATCGCCACCATGTACCCATACGATGTTCCAGATTACGCTAT-3'                     | (Multiple)                            |

|      |                                            |                    |
|------|--------------------------------------------|--------------------|
| JB44 | 5'-AGCGTAATCTGGAACATCGTATGGGTACATGGTGGC-3' | (Multiple)         |
| JB45 | 5'-CATCATCATATGCGTGGAGGCCGCGGC-3'          | NEB-FUS-R1-NLUC-HA |
| JB46 | 5'-CATCATCATATGAGAGGTCGTGGAGGTGGCC         | NEB-FUS-R2-NLUC-HA |

**Supplementary Table 3: gBlock synthetic DNA constructs**

| <b>gBlocks (Integrated DNA Technologies)</b> |                                                                                                                                                                                                                                                                                                                                                                                                                                                                                                                                                                                                                                                                                                    |                                                                                                                                                                                                                                                                                                                                                                                                      |
|----------------------------------------------|----------------------------------------------------------------------------------------------------------------------------------------------------------------------------------------------------------------------------------------------------------------------------------------------------------------------------------------------------------------------------------------------------------------------------------------------------------------------------------------------------------------------------------------------------------------------------------------------------------------------------------------------------------------------------------------------------|------------------------------------------------------------------------------------------------------------------------------------------------------------------------------------------------------------------------------------------------------------------------------------------------------------------------------------------------------------------------------------------------------|
| <b>Name</b>                                  | <b>Nucleotide</b>                                                                                                                                                                                                                                                                                                                                                                                                                                                                                                                                                                                                                                                                                  | <b>Protein</b>                                                                                                                                                                                                                                                                                                                                                                                       |
| FUS-R/S gBlock                               | <p>5'-</p> <p>GGTAAAGAATTCTCCGAAATCCGATA<br/> AAGGTGTCTTTTCGCTACTAGACGGGCT<br/> GATTTCAACAGCGGTGGCCGTAACGG<br/> GAGTGCCGGGTCCGGTAGTGGTGGCC<br/> CGATGGGTTCTGGGGTTATGGTGGC<br/> GGTGGGTCAGGTGGCCGGTGGTAGTGG<br/> GGGCTTTCCGAGTGGTGGCGGCGGAG<br/> GTGGTGGACAGCAGCGGGCGGAGAT<br/> TGGAAATGCCCTAACCCAACGTGTGAA<br/> AACATGAACTTCTCATGGAGAAATGAGT<br/> GTAACCAATGCAAAGCCCCAAACCGG<br/> ACGGGCCGGGTGGTGGCCCGGGTGGT<br/> AGCCATATGGGCGGCAACTATGGCGAT<br/> GATTC AAGTGGTGG AAGTGGCGGTTAT<br/> GATTCTGGTGGTTATAGTGGATCTGGT<br/> GGTGATAGCGGTGGATTTAGCGGCGG<br/> AAGTGGTGGAGGCGATAGCGGGGTT<br/> TTGGCCCGGGCAAATGGATAGCAGC<br/> GGCGAACATAGCCAGGATAGCAGCGA<br/> AAGCCTGTATACGCGTACGCGGCCGCT<br/> GATGC-3'</p> | <p><i>NT</i>_GKEFSGNPIKVSFATRRADFNSGGGN<br/> <b>GSGGSGSGGPMGSGGYGGGGSGGGGS</b><br/> <b>GGFPSGGGGGGGQQRAGDWKCPNPTC</b><br/> <u><b>ENMNF<del>SWRNECNQCK</del>KAPKPDGPGGGP</b></u><br/> <b>GGSHMGGNYGDDSSGGSGGYDSGGYS</b><br/> <b>GSGGDSGGFSGGSGGGDSGGFGPGKM</b><br/> <b>DSSGEHSQDSSES</b>LYTRTRPLM_CT</p> <p>-Bold indicates FUS-Z domain (with R/S mutations)<br/> -Underline indicates ZF region</p> |
| 2XNLS-HA-β23 gBlock                          | <p>5'-</p> <p>CATCATGGATCCGCCACCATGGACCCC<br/> AAGAAGAAGAGGAAGGTGGACCCCAA<br/> GAAGAAGAGGAAGGTGTACCCATACGA<br/> TGTTCCAGATTACGCTATGGATTATAAC<br/> ATCCAGTTCCACAATAATGGTAATGAGA<br/> TCCAGTTCGAGATCGACGATTCTGGTG<br/> GTGATATTGAAATTGAGATCCGCGGCC</p>                                                                                                                                                                                                                                                                                                                                                                                                                                               | <p><i>NT</i>-</p> <p><b>MDPKKKRKVDPKPKRKVYPYDVPDYAMD</b><br/> <u><b>YNIQFHNNGNEIQFEIDDSGGDIEIEIRGP</b></u><br/> <b>GRVHIQLNDGHHGHKVDFFHNDGGELQIDM</b><br/> HTSGSAASAAGAGEAAA-CT</p> <p>-Bold indicates β23<br/> -Underline indicates 2XNLS-HA</p>                                                                                                                                                    |

|                        |                                                                                                                                                                                                                                                                                                                                                                                                                                                                                                                                                  |                                                                                                                                                                                                                                                              |
|------------------------|--------------------------------------------------------------------------------------------------------------------------------------------------------------------------------------------------------------------------------------------------------------------------------------------------------------------------------------------------------------------------------------------------------------------------------------------------------------------------------------------------------------------------------------------------|--------------------------------------------------------------------------------------------------------------------------------------------------------------------------------------------------------------------------------------------------------------|
|                        | CGGGTGGCCGTGTCCACATCCAGCTCA<br>ACGATGGTCATGGTCACATCAAGGTCG<br>ACTTCCACAACGACGGCGGCGAACTTC<br>AAATTGATATGCACACCAGCGGCAGCG<br>CCGCCAGCGCCGCCGGCGCCGGCGA<br>GGCCGCCGCCCTCGAGCATCAT-3'                                                                                                                                                                                                                                                                                                                                                               |                                                                                                                                                                                                                                                              |
| HA-NES-β23<br>gBlock   | 5'-<br>CATCATGGATCCGCCACCATGGACCAG<br>TACCCATACGATGTTCCAGATTACGCTC<br>TGGAGCTGCTGGAGGACCTGACCCTG<br>ATGGATTATAACATCCAGTTCACAATA<br>ATGGTAATGAGATCCAGTTCGAGATCG<br>ACGATTCTGGTGGTGAATTGA<br>GATCCGCGGCCCGGGTGGCCGTGTCC<br>ACATCCAGCTCAACGATGGTCATGGTC<br>ACATCAAGGTCGACTTCCACAACGACG<br>GCGGCGAACTTCAAATTGATATGCACA<br>CCAGCGGCAGCGCCGCCAGCGCCGCC<br>GGCGCCGGCGAGGCCGCCGCCCTCGA<br>GCATCAT-3'                                                                                                                                                     | NT-<br><u>MDQYPYDVPDYALELLEDLTLMDYNIQFH</u><br><u>NNGNEIQFEIDDSGGDIEIRGPGGRVHI</u><br><u>QLNDGHGHKIVDFHNDGGELQIDMHTSG</u><br>SAASAAGAGEAAA-CT<br><br>-Bold indicates β23<br>-Underline indicates HA-NES                                                      |
| FUSZ-NT(R/S)<br>gBlock | 5'-<br>AACTCCGGCGGCGGTAATGGAAGTGG<br>CGGCAGCGGGTTCGGGCGGCCAATGG<br>GTAGCGGCGGTTACGGGGGAGGTGGC<br>TCTGGGGGAGGCGGAAGTGGAGGATT<br>CCCGTCCGGCGGGGGGGTGGAGGC<br>GGCCAACAGCGTGCGGGCGATTGGAA<br>GTGTCCCAACCAACATGTGAGAACAT<br>GAATTTCTCCTGGCGTAACGAGTGCAA<br>CCAATGTAAGGCGCCAAAGCCAGACG<br>GGCCGGGTGGTGGGCCTGGGGGGAG<br>CCACATGGGCGGCAACTATGGAGACG<br>ACCGTCGCGGAGGCCGCGGGGGGTAC<br>GACCGTGGGGGTTATCGTGGCCGCGG<br>GGGAGACCGTGGGGGTTTCCGTGGTG<br>GACGTGGTGGCGGTGATCGCGGCGGC<br>TTTGGTCCGGGAAAATGGACTCCCGT<br>GGCGAGCACCGCCAGGATCGTCGCGA<br>GCGTTTATAC-3' | NT-<br>NSGGGNGSGGSGSGGPMGSGGYGGGG<br>SGGGGSGGFPSGGGGGGGQQRAGDWK<br><u>CPNPTCENMNF<del>SWRNECNQCKAPKPDG</del></u><br><u>PGGGPGGSHMGGNYGDDRRGGRRGGYD</u><br><u>RGGYRGRGGDRGGFRGGRRGGDRGGF</u><br>GPGKMDSRGEHRQDRRERLY-CT<br><br>-Underline indicates ZF region |
| FUSZ-CT(R/S)<br>gBlock | 5'-<br>AACCGTGGCGGAGGTAACGGACGCGG<br>AGGGCGTGGACGTGGAGGGCCTATGG<br>GACGTGGGGGTACGGAGGCGGCGG<br>ATCGGGAGGAGGAGGCCGCGGAGGAT<br>TCCCAAGCGGTGGAGGGGGCGGGGT<br>GGACAACAGCGCGCAGGCGACTGGAA<br>GTGCCCTAATCCTACATGTGAAAATATG<br>AACTTCAGCTGGCGCAACGAATGTAAC<br>CAGTGCAAAGCTCCCAAACAGACGGA<br>CCGGGCGGAGGTCCGGGTGGATCCCA<br>CATGGGCGGAACTACGGAGATGACTC<br>AAGCGGCGGCTCCGGCGGATACGATA<br>GTGGAGGATATAGTGGGTCCGGCGGC<br>GACAGCGGAGGTTTCTCCGGTGGATCA<br>GGGGGAGGCGACTCGGGGGGCTTCG<br>GACCCGGTAAAATGGATAGTTCTGGGG                                             | NT-<br>NRGGGNGRGGRRGGPMGRGGYGGG<br>GSGGGRRGGFPSGGGGGGGQQRAGDW<br><u>KCPNPTCENMNF<del>SWRNECNQCKAPKPD</del></u><br><u>GPGGGPGGSHMGGNYGDDSSGGSGGY</u><br><u>DSGGYSGSGGDSGGFSGGSGGDSGGF</u><br>GPGKMDSSGEHSQDSSESLY-CT<br><br>-Underline indicates ZF region    |

|  |                                         |  |
|--|-----------------------------------------|--|
|  | AACATTCCCAGGATAGTTCCGAGTCCC<br>TTTAT-3' |  |
|--|-----------------------------------------|--|

#### Supplementary Table 4: ASOs

In the table below, deoxyribonucleotides are in plain font, ribonucleotides are underlined, 2'-modified nucleotides are in bold font, and phosphorothioate (PS) linkages are indicated with asterisks (\*).

| <b>ASOs</b> |                                                     |            |                  |
|-------------|-----------------------------------------------------|------------|------------------|
| IONIS ID    | Sequence                                            | RNA Target | 2' Modification  |
| 446654      | 5'-Cy3-C*T*G*C*T*A*G*C*C*T*C*T*G*G*A*T*T*T*G*A-3'   | PTEN       | MOE              |
| 598987      | 5'-Cy3-C*T*G*C*T*A*G*C*C*T*C*T*G*G*A*T*T*T*G*A-3'   | PTEN       | cEt              |
| 391857      | 5'-FITC-C*T*G*C*T*A*G*C*C*T*C*T*G*G*A*T*T*T*G*A-3'  | PTEN       | LNA              |
| 626825      | 5'-Cy3-C*T*G*C*T*A*G*C*C*T*C*T*G*G*A*T*T*T*G*A-3'   | PTEN       | $\alpha$ -fluoro |
| 851810      | 5'-AF647-C*T*G*C*T*A*G*C*C*T*C*T*G*G*A*T*T*T*G*A-3' | PTEN       | MOE              |
| 766633      | 5'-AF594-C*T*G*C*T*A*G*C*C*T*C*T*G*G*A*T*T*T*G*A-3' | PTEN       | MOE              |
| 766635      | 5'-AF594-C*T*G*C*T*A*G*C*C*T*C*T*G*G*A*T*T*T*G*A-3' | PTEN       | cEt              |
| 766637      | 5'-AF594-C*T*G*C*T*A*G*C*C*T*C*T*G*G*A*T*T*T*G*A-3' | PTEN       | $\alpha$ -fluoro |
| 950431      | 5'-Cy3-C*C*T*T*C*C*C*T*G*A*A*G*G*T*T*C*C*T*C*C-3'   | None       | cEt              |
| 950432      | 5'-Cy3-T*A*G*T*G*C*G*G*A*C*C*T*A*C*C*A*C*G*A-3'     | None       | cEt              |
| XL198       | 5'-Cy3-C*T*G*C*T*A*G*C*C*T*C*T*G*G*A*T*T*T*G*A-3'   | PTEN       | DNA              |
| JB39        | 5'-AF594-CUGCUAGCCUCUGGAUUUGA-3'                    | PTEN       | RNA              |
| JB40        | 5'-CTGCTAGCCTCTGGATTTGA-3'                          | PTEN       | DNA              |
| JB41        | 5'-C*T*G*C*T*A*G*C*C*T*C*T*G*G*A*T*T*T*G*A-3'       | PTEN       | DNA              |
| JB42        | 5'-C*U*G*C*U*A*G*C*C*U*C*U*G*G*A*U*U*U*G*A-3'       | PTEN       | RNA              |
